1 **Complete representation of a tapeworm genome reveals**  
2 **chromosomes capped by centromeres, necessitating a dual role in**  
3 **segregation and protection**

4

5 Peter D. Olson<sup>1\*†</sup>, Alan Tracey<sup>2†</sup>, Andrew Baillie<sup>1</sup>, Katherine James<sup>1,3</sup>, Stephen R. Doyle<sup>2</sup>, Sarah  
6 K. Buddenborg<sup>2</sup>, Faye H. Rodgers<sup>2</sup>, Nancy Holroyd<sup>2</sup> and Matt Berriman<sup>2\*</sup>

7

8 \*Co-corresponding authors: Peter D. Olson ([p.olson@nhm.ac.uk](mailto:p.olson@nhm.ac.uk)) and Matt Berriman  
9 ([mb4@sanger.ac.uk](mailto:mb4@sanger.ac.uk))

10 †Co-lead authors

11 <sup>1</sup>Department of Life Sciences, Natural History Museum, Cromwell Road, London SW7 5BD,  
12 United Kingdom

13 <sup>2</sup>Wellcome Sanger Institute, Wellcome Genome Campus, Hinxton, Cambridgeshire CB10 1SA,  
14 United Kingdom

15 <sup>3</sup>Department of Applied Sciences, Northumbria University, Newcastle upon Tyne, NE1 8ST,  
16 United Kingdom

17 Email: PDO, [p.olson@nhm.ac.uk](mailto:p.olson@nhm.ac.uk); AT, [alt@sanger.ac.uk](mailto:alt@sanger.ac.uk); AB, [a.baillie@nhm.ac.uk](mailto:a.baillie@nhm.ac.uk); KJ,  
18 [katherine.p.m.james@northumbria.ac.uk](mailto:katherine.p.m.james@northumbria.ac.uk); SRD, [sd21@sanger.ac.uk](mailto:sd21@sanger.ac.uk); SKB, [skb@sanger.ac.uk](mailto:skb@sanger.ac.uk);  
19 FHR, [fr7@sanger.ac.uk](mailto:fr7@sanger.ac.uk); NH, [neh@sanger.ac.uk](mailto:neh@sanger.ac.uk); MB, [mb4@sanger.ac.uk](mailto:mb4@sanger.ac.uk)

20

## 21 **Abstract**

22 **Background:** Chromosome-level assemblies are indispensable for accurate gene prediction,  
23 synteny assessment and understanding higher-order genome architecture. Reference and draft  
24 genomes of key helminth species have been published but little is yet known about the biology  
25 of their chromosomes. Here we present the complete genome of the tapeworm *Hymenolepis*  
26 *microstoma*, providing a reference-quality, end-to-end assembly that represents the first fully  
27 assembled genome of a spiralian/lophotrochozoan, revealing new insights into chromosome  
28 evolution.

29 **Results:** Long-read sequencing and optical mapping data were added to previous short-read  
30 data enabling complete re-assembly into six chromosomes, consistent with karyology. Small  
31 genome size (169 Mb) and lack of haploid variation (1 SNP/3.2 Mb) contributed to exceptionally  
32 high contiguity with only 85 gaps remaining in regions of low complexity sequence. Resolution of  
33 repeat regions reveals novel gene expansions, micro-exon genes, and spliced leader trans-  
34 splicing, and illuminates the landscape of transposable elements, explaining observed length  
35 differences in sister chromatids. Syntenic comparison with other parasitic flatworms shows  
36 conserved ancestral linkage groups indicating that the *H. microstoma* karyotype evolved through  
37 fusion events. Strikingly, the assembly reveals that the chromosomes terminate in centromeric  
38 arrays, indicating that these motifs play a role not only in segregation, but also in protecting the  
39 linear integrity and full lengths of chromosomes.

40 **Conclusions:** Despite strong conservation of canonical telomeres, our results show that they  
41 can be substituted by more complex, species-specific sequences, as represented by  
42 centromeres. The assembly provides a robust platform for investigations that require complete  
43 genome representation.

44

45 **Keywords:** Chromosome assembly, Telomere loss, Centromeres, Flatworms, *Hymenolepis*

46

## 47 **Background**

48 Parasitic flatworms are responsible for a significant part of the global worm burden and are  
49 ubiquitous parasites of effectively all vertebrate species and many invertebrate groups. Over the  
50 past decade reference and draft genomes of key fluke and tapeworm species have been  
51 produced including the causative agents of schistosomiasis, neurocysticercosis and hydatid  
52 disease [1-6]. Subsequently, improved assemblies and annotations have been published [7]  
53 and/or released to the public, as have RNA sequences from an increasing number of  
54 transcriptomic studies, profiling genome-wide gene expression for different life cycle stages, cell  
55 compartments and experimental conditions [8-11]. Most recently, the diversity of draft genomes  
56 of both flatworm and roundworm helminths has been expanded, enabling broader  
57 circumscription of helminth-specific gene families and more informative comparative analyses  
58 [12]. Despite the growing number of such resources for helminths, little is yet known about their  
59 genomic architecture.

60 Rodent/beetle-hosted *Hymenolepis* species are among the principle tapeworm laboratory  
61 models as they enable access to all stages of their complex life cycle. A draft genome of the  
62 laboratory strain of the mouse bile-duct tapeworm [13], *Hymenolepis microstoma*, was published  
63 in 2013 [6] and updated with additional data and re-released as version 2 on WormBase  
64 ParaSite (WBP) [11] in 2015 (details of the v2 assembly are described in [8]). Here we present  
65 the third major release of the genome; a reference quality update to the assembly that was  
66 made available to the public with the 12<sup>th</sup> release of WBP (December 2018). The genome has  
67 been assembled into full chromosomes, based on the addition of long-read sequence data to  
68 previous short-read data followed by extensive alignment, manual review and re-assembly  
69 guided by optical mapping data. With this release, *H. microstoma* represents the most  
70 completely assembled genome of the lophotrochozoan superphylum.

## 71 **Results**

### 72 **A complete chromosomal representation of the *Hymenolepis microstoma* genome**

73 Using a combination of sequencing technologies we have produced a 169 Mb v3 assembly of  
74 the *H. microstoma* genome that is consistent with the known karyotype [14,15]: six scaffolds  
75 ranging in size from 17.5 to 43 Mb represent the end-to-end sequences of the six chromosomes  
76 (Chr) (Fig. 1, Table S1), while a single, additional contig represents the mitochondrial genome  
77 (for a description see Fig. S1). A hybrid assembly was produced based on independent  
78 assemblies of long-read Pac-Bio™ sequence data (127x genome coverage), short-read  
79 Illumina™ sequence data (115x coverage) and Iris® optical mapping data (77x coverage), and  
80 included extensive manual improvements as detailed in the Methods. In total, only 85 scaffolding  
81 gaps remain and each is bounded by highly repetitive sequences. Thus collapsed repeats (i.e.  
82 tandem repeats assembled as one) rather than novel, non-repetitive sequences likely account  
83 for any missing data in gapped regions. The v3 assembly therefore represents an effectively  
84 complete picture of the genome both in terms of sequence coverage and assembly and  
85 represents a step-change compared with previous releases, with all metrics of assembly  
86 contiguity improved by orders of magnitude (Table 1).

### 87 **The re-estimated proteome reveals novel gene expansions and previously unidentified** 88 **classes of genes**

89 The high quality of the genome assembly enabled a more complete complement of genes to be  
90 identified. More than 1,700 genes were structurally improved, resulting in an increased average  
91 gene length and number of exons per gene despite the total number of models increasing only  
92 slightly from the first version (Table 1). In total, 10,139 gene models and 1,310 splice variants  
93 were identified using Braker2 [16]. Using Kallisto [17], 10% and 5% more RNA-seq reads map to  
94 the v3 transcriptome than to v1 and v2, respectively. Using Orthofinder [18], many transcripts  
95 showed clear one-to-one orthology with two near-complete, chromosome-level genome

96 assemblies of other parasitic flatworms: 62% with the hydatid tapeworm *Echinococcus*  
97 *multilocularis* (v4) and 47% with the human blood fluke *Schistosoma mansoni* (v7) (Table 1,  
98 Table S2). Compared with the v1 and v2 assemblies, this amounts to 8% and 6% more one-to-  
99 one orthologues with *E. multilocularis* and 12% and 6% more with *S. mansoni*, respectively.  
100 Overall, the number of genes and average intron and exon size of the v3 proteome is most  
101 consistent with the v1 release, whereas the v2 annotation contained an inflated gene count. This  
102 indicates that the gene model estimates have stabilized, and together with the assembly and  
103 proteome completeness metrics, reflects the advanced level to which the annotation of coding  
104 regions has been completed for this genome. A full list of *H. microstoma* gene models and  
105 annotations together with *E. multilocularis* orthologues is given in Table S3.

106 Consistent with the expansion of previously under-represented repeat arrays discussed  
107 below, we find that 99 genes previously present as single copies now exist as families with at  
108 least three paralogues (Fig. S2, Table S4). Amongst the 12 families with the largest expansions  
109 ( $\geq 5$ -fold) compared with the v1 genome, a notable example is a C2H2-type zinc finger gene that  
110 now has ten copies where previously there was just one. Three families (encompassing 16  
111 genes in v3 but only 3 in v1) are similar to major vault proteins – a cytoplasmic ribonuclear  
112 protein complex – and seven families have no obvious sequenced-homologs in other organisms  
113 and potentially represent proteins with novel biological functions.

114 Using the Benchmarking Universal Single-Copy Orthologs (BUSCO) approach [19], 77%  
115 of expected genes were identified as complete and without duplication (Table S5). This  
116 compares favourably with the manually finished reference genomes of *E. multilocularis* (70%)  
117 and *S. mansoni* (73%); completeness scores for parasitic flatworms always fall considerably  
118 short of the 100% benchmark. It is therefore likely that many suggested ‘core’ metazoan genes  
119 have been lost or have significantly diverged in the flatworm lineage, rather than being  
120 erroneously absent from these assemblies. For example, of the 178 BUSCO core genes missing  
121 from the v3 assembly, 160 are also missing from *E. multilocularis* and 135 from *S. mansoni*  
122 (Table S6). Another factor is likely to be that the lophotrochozoan superphylum is represented by  
123 only three species in the BUSCO metazoan database (v3.0.2: two molluscs and one annelid

124 worm). Such under-representation of one of three superphyla may be biasing the circumscription  
125 of 'core' genes in the Metazoa.

126 Previously generated RNA-seq data representing different life cycle stages and regions  
127 of the adult, strobilar worm were re-mapped to the new v3 assembly and proteome and the  
128 resulting table of counts used to estimate differentially expressed genes as described in Olson et  
129 al. [8]. Complete lists of up/down-regulated genes ranked by their log<sub>2</sub> fold-change are given for  
130 all sample contrasts in Tables S7.1-7.7. Comparison with estimates based on the v2 assembly  
131 reported in Olson et al. [8] shows a highly linear relationship with the new estimates (Fig. S3)  
132 and tight clustering among sample replicates based on principal component analyses (Fig. S4A).  
133 Heat map analyses (Fig. S4B) indicate that the transcriptome of the scolex-neck region of the  
134 adult is more similar to that of the metamorphosing larvae than to the mid or end reproductive  
135 regions of the adult, and this was also shown to be supported by subsets of genes representing  
136 signalling pathways and transcription factors as discussed in [8]. Thus while the new analyses  
137 supersede those in [8] and include additional differentially expressed genes new to the v3  
138 proteome (highlighted in Tables S7.1-7.7), they also corroborate our previous inferences of  
139 differential gene expression.

#### 140 **Transposable elements comprise a quarter of the genome**

141 Transposable elements (TEs) are among the principal drivers of gene evolution and genome  
142 architecture and often comprise the bulk of the DNA in many organisms [20]. TEs comprise  
143 approximately 23% of the v3 assembly, although as discussed below the true proportion is likely  
144 to be even greater. Of the 23%, 1% is derived from Long Interspersed Nuclear Elements  
145 (LINEs), 2% from Long Terminal Repeat retrotransposons and 4% from DNA transposons  
146 (Table S8), the most common of which are Mariner-like elements. Although most TEs are highly  
147 dispersed, many exist in either a small number of locations or a single location in the genome  
148 (Fig. 2). For example, there is a single island of Ginger-type DNA transposons (Chr5: 18.2–18.4  
149 Mb), L1 elements are concentrated on Chr2 (15.4–16.2 Mb) and L2 elements are concentrated  
150 on Chr5 (2.2–6.4 Mb). 14.8% of the total repetitive sequence remains unclassified (Fig. 2, Table

151 S9).

152           Although the addition of long read data in the present assembly enabled full resolution of  
153 many more repeat arrays than in previous versions, the depth of coverage of reads realigned to  
154 the genome assembly is inordinately high in many places (Fig. 1) indicating that for some  
155 repeats, multiple sequenced copies are aligning to fewer copies in the assembled consensus.  
156 The true size of some of the largest repeat arrays therefore remains under-represented,  
157 including the ribosomal RNA, telomeric and centromeric arrays. Two of the largest examples are  
158 on Chr1 (38.9–40.7 Mb) and Chr3 (0.75–4.2 Mb) that are currently assembled into sequences  
159 less than half of their expected size based on the relative depth of coverage (labelled A and B,  
160 respectively, on Fig. 1). In contrast, Chr4 is notable in having a low proportion of repeats; only  
161 14% of the chromosome is classified as repeat compared with 21–28% across the other  
162 chromosomes. The ribosomal RNA array located on Chr2 stands out as the most prominent  
163 single repeat type, with an assembled length of 767 kb (0.45% of the assembly). However, its  
164 true size based on depth of sequence coverage is likely to be closer to 7.5 Mb (4.4% of the  
165 genome), further discussed below.

166           Repeat content in the first published tapeworm genomes was reported at 7-11%, of  
167 which only 2% was attributed to TEs [6]. This proportion of repeats and TEs is exceptionally low  
168 and was most likely a reflection of both the inability to fully resolve repetitive regions using short-  
169 read data and differences in the identification of TEs. Although TE content is highly variable both  
170 across and within animal taxa [21], estimates here of ~25% of the genome content is more  
171 typical of metazoans in general and closer to that reported for *S. mansoni* (~35%) [1].

## 172 **Variable repeat regions explain length discrepancies in sister chromatids**

173 It was noted from karyology that sister chromatids are not equal in length [14] and that this was  
174 especially visible in the largest pair [15]. Although these studies could not rule out the possibility  
175 that such differences resulted from the squash technique employed, our sequence data  
176 corroborate their observations; whereas we see little to no sequence variation in our assembled  
177 contigs, optical mapping data suggest that the largest tandem repeats, which remain elusive to

178 full resolution, could have differing lengths in each pair of sister chromatids. For example, while  
179 an optical contig spans the rRNA repeat on Chr2 (the second largest chromosome), giving a  
180 short 200 kb form with 17 copies, another optical contig extends into but not across the array,  
181 and likely represents the longer version of a larger, alternative haplotype (Fig. S5). It is not  
182 possible to directly measure the length of this latter copy but using mapped coverage of Illumina  
183 reads from a single library, Chr2 has a median coverage depth of 96x, yet there is a median  
184 coverage of 754x over the 486 kb region containing the repeat. We therefore extrapolate that the  
185 repeat region exists in the sister chromatid as sequence close to 7.5 Mb. Thus sister chromatids  
186 from Chr2 could vary in length by ~25% due to dimorphism in this one repeat region alone.  
187 Several other less extreme cases of optical contigs giving two different lengths for the same  
188 locus are apparent in the whole genome optical map (Fig. S6), and there are other large repeat  
189 regions whose full size is not currently known that could contribute further to homologous  
190 chromosomes having unequal lengths.

### 191 **Micro-exon genes are identified in the v3 assembly**

192 Genes containing micro-exons that code for as little as a single amino acid occur throughout  
193 biology [22]. However, the term micro-exon gene (MEG) was coined for a class of gene that was  
194 first identified in the genome of *S. mansoni* [1] and subsequently in *E. multilocularis* [6]. In these  
195 genes, multiple micro-exons are present with lengths divisible by three bases, enabling the  
196 creation of proteins varying by a single amino acid via exon skipping [23]. Due to their small  
197 exons, MEGs are a challenge for gene-finding and RNA-seq reads often fail to align. In contrast  
198 to 72 reported MEGs in *S. mansoni* (we now find 109 in the v7 release) and  $\geq 8$  in *E.*  
199 *multilocularis* (we now find 35 in the v4 release), none was originally reported for *H. microstoma*.  
200 However, the greatly improved assembly and proteome enabled us to identify 52 MEGs with a  
201 total of 91 transcripts (Table S10). Ten of the MEGs with 14 transcripts are found in a single  
202 region of Chr6 (2,643,059–3,072,453) and all share a conserved amino acid sequence motif  
203 (consensus: MRLFILLCFAVTLWACPKQCP) that indicates that they belong to a single gene  
204 family that expanded via tandem duplication (Fig. S7). A concerted effort to identify and curate  
205 MEGs across several flatworm lineages is a high priority for trying to find clues to the functional



206 roles of this numerous yet poorly understood class of genes. However, as many MEGs contain  
207 repetitive sequences they are a challenge to analyse without extensive manual curation and at  
208 present orthogroups can not be determined with confidence.

### 209 **RNA-seq data demonstrate evidence of spliced leader trans-splicing**

210 Spliced-leader (SL) trans-splicing is an mRNA maturation process in which a 5' donor sequence  
211 encoded by its own locus (i.e. the splice leader gene) is spliced to the 5' exons of other gene  
212 transcripts and was first identified in tapeworms by Brehm et al. [24]. We identified the presence  
213 of SL trans-spliced transcripts in the transcriptomes of adult and larval *H. microstoma* for the first  
214 time. We hypothesised that leader sequences would be present in total RNA-seq libraries and  
215 identifiable by their abundance in soft-clipped read segments after alignment to the genome.  
216 Using this approach we successfully recovered the previously identified *E. multilocularis* and *S.*  
217 *mansoni* SL sequences [24,25] from analyses of publicly available RNA-seq libraries (Fig. S8A).  
218 Our method identified 3,876 genes as being putatively trans-spliced in *S. mansoni* on the basis  
219 of having at least one SL-associated read across all of the libraries analysed, reducing this to a  
220 conservative set of 1,219 genes with at least ten SL-associated reads. This is comparable with  
221 previous estimates of trans-splicing in *S. mansoni* based solely on total RNA-seq libraries [25].  
222 For *E. multilocularis*, 1,609 genes were identified with  $\geq 1$  SL-associated read and 527 with  $\geq 10$   
223 reads.

224 Clustering soft clipped read segments from *H. microstoma* resulted in three abundant  
225 clusters, referred to as SL1, SL2 and SL3 (Fig. S8A). Screening these 23-27 bp putative SL  
226 sequences against the genome showed that the SL1 motif is found in each of the two exons that  
227 comprise gene model HmN\_002290900 (Chr1), SL2 is found in an intronic region associated  
228 with gene model HmN\_000738800 (Chr3), and SL3 is found in a single exon associated with  
229 gene model HmN\_000738800 (Chr1). No other region in the genome contained these  
230 sequences. Based on these SL sequences we identified 1,341 genes with  $\geq 1$  read and 496  
231 genes with  $\geq 10$  reads as being putatively trans-spliced. Of the latter, 449 were associated with  
232 all three SL sequences, having at least one read of each SL aligned. Similarly, the total number

233 of trans-spliced transcripts found for each SL was highly similar (SL1 = 18,831, SL2 = 18,725,  
234 SL3 = 19,241) and the use of 'interchangeable' alternative SL forms was also reported for *E.*  
235 *multilocularis* [6]. Using the annotation tool Apollo [26], we validated a subset of these genes as  
236 being trans-spliced based on a sharp drop in RNA-seq coverage at the 5' end of the gene  
237 accompanied by an abundance of soft clipped reads, and by the presence of a consensus splice  
238 acceptor ('AG') coincident with the accumulation of soft clipped reads (example shown in Fig.  
239 S8C). A complete list of trans-spliced gene models and associated SLs found in each RNA-seq  
240 sample replicate is given in Table S11. Notably, we found that libraries derived from larval *H.*  
241 *microstoma* samples had five times as many trans-spliced genes as libraries derived from adult  
242 worms (Fig. S8B).

243 Early reports of SL trans-splicing in trypanosomes, nematodes and flatworms led to the  
244 mechanism being associated with parasitism and interest in it as a potential novel target for  
245 chemotherapy [27]. However, further investigation has continued to expand the range of free-  
246 living eukaryotic groups in which it is found and this together with structural and functional  
247 similarities in the trans-splicing machinery point to it being an ancient process that has been lost  
248 independently in most metazoans [28] rather than a process that has been re-invented  
249 numerous times [29]. *H. microstoma* genes identified as being trans-spliced ( $\geq 10$  aligned  
250 reads) were assigned to 494 orthogroups and in 337 of these cases an *S. mansoni* or *E.*  
251 *multilocularis* gene in the same orthogroup was also identified as being trans-spliced, while a  
252 core group of 134 orthologues was found to be shared by all three species (Fig. S8D). Spliced  
253 leader trans-splicing has also been identified in free-living flatworms [30], but a full inventory of  
254 trans-spliced genes in their genomes is needed to investigate to what extent, if any, the process  
255 could be associated with parasitism in the phylum. In *H. microstoma* we found that trans-splicing  
256 predominates during larval metamorphosis, a period that has been suggested to represent the  
257 phylotypic stage of the tapeworm life cycle [31], suggesting that the process may be associated  
258 evolutionarily with ontogeny.

259 **Comparative analysis of chromosomal synteny reveals evidence of ancient linkage**  
260 **groups**

261 Extensive conservation of synteny is clearly evident when comparing the three chromosome-  
262 level assemblies of parasitic flatworms. Large regions of *H. microstoma* align to single, often  
263 chromosome-sized regions in *E. multilocularis*, enabling the *H. microstoma* chromosomes to be  
264 'painted' based on their *E. multilocularis* equivalents (Fig. 1). Between them there are three  
265 breaks in overall synteny and when the tapeworm genomes are compared to the blood fluke  
266 further breaks in synteny can be discerned that define blocks of chromosomal regions that have  
267 persisted as ancestral linkage groups (Fig. 3), recently termed 'Nigon units' [32]. Using *S.*  
268 *mansoni* as an outgroup, we can infer that the three tapeworm breaks in synteny are fusions (H1  
269 *cf.* E1+8, H5 *cf.* E5+7, and H6 *cf.* E6+9) as the synteny blocks that have fused to make these *H.*  
270 *microstoma* chromosomes exist separately in the blood fluke (Table S12). In addition to three  
271 fusion events, synteny evidence allows us to unambiguously order and orientate two scaffolds  
272 from the *E. multilocularis* assembly to form a single chromosome, corresponding to a single  
273 ancestral linkage group (labelled E9 in Fig. 1B and G in Fig. 3C). By doing so, the *E.*  
274 *multilocularis* genome assembly resolves to n=9 chromosomes, in agreement with its karyotype  
275 [33].

276 Although synteny blocks are preserved between these genomes, extensive  
277 rearrangements appear to have happened since the fusions occurred which have caused mixing  
278 of the synteny blocks such that, in each case, there is no single fusion point, but rather large  
279 regions that attest to the fusions. Analysis of one-to-one orthologues reveals that their  
280 intrachromosomal order and relative positions are almost entirely scrambled between the blood  
281 fluke and tapeworms (Fig. 3B). However, between the two tapeworms we see much greater  
282 preservation of gene order, where in some cases (e.g. Chr3 of *H. microstoma* and Chr4 of *E.*  
283 *multilocularis*) effectively no large scale rearrangement has occurred (Fig. 3A). Given that inter-  
284 chromosomal rearrangements are exceptionally rare compared with intra-chromosomal  
285 rearrangements, the level of shuffling between ancestral blocks provides some indication of the  
286 time in which these blocks have been linked together.

287 **Chromosome ends are capped by a combination of telomeric and centromeric repeats**

288 One of the most striking features of the assembly is that the chromosomes possess telomeric  
289 repeats at only one end, whereas opposing ends terminate with a novel repeat array. At the  
290 telomeric ends, five of the chromosomes exhibit the canonical hexamer sequence of most  
291 telomeres (GGGATT) [34], whereas Chr4 exhibits variation in sequence with the dominant  
292 hexamer having a single base variant (TTCGGG). At opposing (non-telomeric) ends we find a  
293 novel repeat with a median unit length of 179 bp that exhibits several unique traits typical of  
294 centromeres: its size is consistent with centromere repeat monomers tending to be about that of  
295 one nucleosomal DNA unit (146 bp) [35], (*Homo sapiens*, 171 bp; *Arabidopsis thaliana*, 178 bp;  
296 and *Zea mays*, 156 bp.); its sequence is species-specific and highly conserved across  
297 chromosomes [36] (with the exception of Chr2 discussed below); and there is only one, large  
298 repeat array per chromosome. Moreover, among the sequences that contain this repeat we only  
299 find a single junction from unique sequence into the repeat and no junction out of it into another  
300 sequence as we find in all other repeats in the genome, and hence it represents a terminal  
301 sequence. Finally, we note that in each chromosome the orientation of the repeat remains  
302 constant relative to the telomere. That is, by aligning the chromosomes by their telomeric ends  
303 (requiring reverse complimenting of Chr1 and Chr2; see Fig. 1) the centromeric sequences are  
304 also in alignment. Using the first published assembly [6] and purely algorithmic means (i.e. high  
305 copy number, large tandem repeats), this same motif was independently predicted to be the  
306 centromere by Melters et al. [37]. We estimate the total size of each repeat array to be at least  
307 5.5 Mb.

308       Whereas five of the chromosomes have identical motifs, Chr2 contains not only the same  
309 novel centromere motif but also a second dominant motif (Fig. S9). In addition, the array is larger  
310 and interspersed with other repetitive elements (e.g. gag pol polyprotein) and has a larger sub-  
311 telomeric region (Fig. S10). To corroborate our results we used chromosomal fluorescent *in situ*  
312 hybridisation (FISH) with probes against the canonical telomeric sequence, showing that only  
313 one telomere array is present on each chromosome (Fig. 4A) and that it is opposite to the joined  
314 ends of sister chromatids (Fig. 4B), as predicted by our assembly.

## 315 Discussion

316 Such a highly resolved assembly is still unusual and is a product of not only long-read sequence  
317 data and optical mapping but also a process of manual improvement. Using Gap5 [38], we were  
318 able to scrutinise sequence assemblies from the level of individual base pairs up to whole  
319 chromosomes, facilitating diagnosis and resolution of mis-assemblies as well as enabling further  
320 scaffolding from clues contained in the read coverage and read-linking data. In this way we  
321 have, unusually, been able to place all of the generated sequence data into a chromosomal  
322 location, leaving an assembly that is resolved into the same number of scaffolds as the  
323 karyotype, with a combined coverage of over 300x. Moreover, although 85 gaps remain there is  
324 strong evidence that no novel, complex sequence is missing from the assembly. Assembly was  
325 further aided by exceedingly low levels of haploid variation, with only 52 SNPs present in the  
326 entire genome. Such low intraspecific genetic variation is very unusual and is presumed to be  
327 the result of sequencing a highly inbred laboratory strain [13].

328 Chromosomes with terminal centromeres have not been demonstrated previously.  
329 However, in describing the *H. microstoma* karyotype Hossain and Jones [15] stated that while  
330 “the location of the centromere is not clearly visible in the metaphase chromosomes, from the  
331 observations of early anaphase of first cleavage it is obvious that all centromeres are terminal or  
332 very nearly so.” Here using deep sequencing we demonstrate that the chromosomes do indeed  
333 terminate in centromeric arrays that through the course of evolution have most likely come to  
334 replace previously existing telomeric arrays. Species lacking canonical telomeres have been  
335 found to have chromosomes terminating in either mutated versions of the telomeric sequences  
336 themselves (e.g. chironomid midges [39]) or in mosaics of identifiable TEs (e.g. *Drosophila*  
337 *melanogaster* [40]). The 179 bp motif of *H. microstoma* is 30-fold larger than the canonical  
338 telomere motif making it unlikely to have evolved directly from a telomeric array. It is also unique,  
339 showing no match to known TEs or indeed to any known sequence in the nr database. Thus  
340 while definitive validation relies on evidence of centromere-specific histone proteins (CENP-

341 A/CENH3) at the putative region of the chromosome [41], all evidence is consistent with the  
342 repeat motif representing the centromere, as independently concluded by Melters et al. [37].

343       Telomeres are normally present on both ends of chromosomes where they function to  
344 maintain linear integrity and length homeostasis [42]. The terminal position of the centromeres  
345 suggests that they must act not only as centromeres in providing a substrate for spindle  
346 formation during segregation, but that they also play the role of telomeres in protecting  
347 chromosome ends from resembling double-stranded breaks. Moreover, being terminal means  
348 that the repeats are subject to end replication loss [43] which is normally mediated by a  
349 telomerase-dependent replication mechanism [44]. Whether telomeric-specific proteins in *H.*  
350 *microstoma* have evolved to interact with the centromeric motif, or instead a telomerase-  
351 independent mechanism is at play is unknown, but the latter has been suggested as a possibility  
352 to explain differences in telomere maintenance between sexual and asexual strains of planarian  
353 flatworms [45]. Interestingly, telomere interacting proteins have been found to be under rapid  
354 evolution despite strong conservation of their function [42]. This paradoxical observation is  
355 similar to the ‘centromere paradox’ in which centromeric sequences are species-specific despite  
356 their ultra-conserved role in chromosome segregation [46]. The answer to the paradox appears  
357 to be found in the rapid evolution of the sub-telomeric and peri-centrosomal repeats that  
358 accompany these arrays [36,42] and it is becoming increasingly clear that despite their functions  
359 being perfectly conserved, centromeric and telomeric regions undergo highly dynamic evolution  
360 driven by TEs [47].

## 361 **Conclusions**

362 Third generation sequencing technologies have enabled the production of highly contiguous  
363 genome assemblies that provide more accurate estimates of content as well as the ability to  
364 investigate syntenic relationships and other higher-order features of genome architecture. With  
365 the third release of the *Hymenolepis microstoma* genome we have produced a reference quality,  
366 end-to-end assembly that provides complete chromosomal representation. The hybrid assembly

367 has stabilised estimates of the proteome and non-coding regions and represents a resource  
368 effectively free from sampling error. The release thus provides a robust platform to begin  
369 systems-level analyses in parasitic flatworms and to this end has been recently used to infer  
370 protein-protein interactions based on functional data gathered from major model systems [48].

371 Producing a fully resolved assembly revealed several unexpected features. Comparative  
372 analyses show that large-scale syntenic relationships remain readily apparent even between  
373 tapeworms and flukes, which although potential sister groups {Lockyer:2003wj}, represent an  
374 ancient split in the Neodermata that was followed by enormous species diversification. Optical  
375 mapping indicates that homologous chromosomes differ significantly in length as a result of  
376 profound size differences in tandemly repeated arrays of transposable elements and ribosomal  
377 genes. Of broadest significance is the finding that chromosomes can terminate in centromeric  
378 arrays, providing not only another example of telomere substitution, but also insight into the  
379 putative conversion of centromeric motifs. Whether this proves to be a feature unique to this  
380 species or is instead common among species with telocentric karyotypes awaits additional  
381 chromosome level assemblies of eukaryotic genomes.

382

## 383 **Methods**

### 384 **Sample preparation**

385 All genome data were derived from the Nottingham laboratory strain [13] of the mouse bile-duct  
386 tapeworm *Hymenolepis microstoma* which was maintained *in vivo* using flour beetles (*Tribolium*  
387 *confusum* and *T. castaneum*) and mice. Genomic DNA for long-read sequencing was extracted  
388 using a CTAB protocol. 20 mg damp weight of tissue was pooled from the anterior of adult  
389 worms (i.e. scolex, neck and immature strobila) which lack reproductive organs or embryos,  
390 thereby avoiding genetic variation resulting from gametogenesis and cross-fertilisation. Tissues  
391 were homogenised with a plastic pestle in a 1.5 ml Eppendorf, to which was added 0.5 ml CTAB

392 solution (2% w/v hexadecyltrimethyl-ammonium bromide, 100 mM Tris pH 8.0, 20 mM EDTA pH  
393 8.0, 1.4 M sodium chloride, 1% w/v polyvinylpyrrolidone), 50 µl Sarkosyl solution (10% w/v  
394 sodium lauroylsarcosinate in 100 mM Tris pH 8.0), 10 µl Proteinase K (20 mg/ml) (ProtK) and 10  
395 µl RNaseA (10 mg/ml). Samples were inverted to mix and incubated at 60°C for 1 hr, after which  
396 0.5 ml Sevac (24:1 chloroform:isoamyl alcohol) was added, the samples mixed and centrifuged  
397 at ~13,000 rpm for 3 min. The top, aqueous layer containing DNA was transferred to a new  
398 Eppendorf and another 0.5 ml Sevac added and the samples mixed and centrifuged for three  
399 minutes. The top layer was transferred to a new Eppendorf, to which 400 µl isopropanol was  
400 added and mixed. The samples were centrifuged for 15 min at 4°C, after which the supernatant  
401 was removed and 0.5 ml 70% ethanol added. The samples were centrifuged for 5 min at 4°C,  
402 the supernatant removed, and the DNA pellet dried in a heating block at 60°C for 5 min. The  
403 DNA was re-suspended in 100 µl of ultrapure water and the quantity and quality determined  
404 using a NanoDrop spectrophotometer and a TapeStation 2200 fluorometer (Agilent  
405 Technologies).

406 Genomic DNA for optical mapping was extracted from agarose-embedded specimens  
407 using the CHEF Genomic Plug DNA kit (BioRad) in order to minimise fragmentation. Four  
408 samples were prepared, using 500 and 1,000 larvae (i.e. fully patent cysticercoids harvested  
409 from beetles), and 3 (6.6 mg damp weight) and 7 (10.9 mg) sections of adult worm (anterior ~2  
410 cm each; as above). 2% CleanCut (BioRad) agarose was melted at 70°C then cooled to 50°C.  
411 Moulds were pre-chilled to 4 °C in the refrigerator. Larval and adult worm sections were left  
412 whole and washed in 1 ml phosphate-buffered saline (PBS), then in 200 µl Cell Suspension  
413 Buffer, before the latter was added to the washed samples to a final volume of 50 µl. 30 µl of  
414 melted agarose was then added and the suspension mixed with a wide bore pipette tip before 80  
415 µl of the agarose-sample mixture was added to a mould well. The mould was then wrapped in  
416 parafilm and refrigerated at 4°C for 1 hr. ProtK solution was prepared by adding 16 µl protK  
417 stock to 200 µl protK buffer for each 80 µl agarose plug. Refrigerated plugs were removed from  
418 their moulds into individual 1.5 ml Eppendorf tubes containing the 216 µl of protK solution and  
419 incubated for 2 hr at 50°C in a shaking incubator. The protK was exchanged for fresh solution



420 and the plugs incubated for another 24 hr, after which the protK was exchanged again and the  
421 plugs were incubated for another 48 hrs. RNAs were eliminated by treating with 10 µg/ml RNase  
422 A (Roche) for 1 hr at 37 °C. Plugs were rinsed briefly three times in Wash Buffer and then four  
423 times for 15 min each. ProtK digested specimen plugs were stored in Wash Buffer prior to gDNA  
424 recovery.

#### 425 **Long-read sequencing**

426 19 Gb of long-read sequence data were generated using Pacific Biosciences single-molecule  
427 real-time sequencing (SMRT) technology. DNA for sequencing was prepared using the  
428 SMRTbell Template Prep Kit 1.0, according to the manufacturer's protocol, with the exception  
429 that shearing was performed using a 26G blunt end needle. A library of ~10 kb sequencing  
430 templates was size-selected using SDS-Agarose on a Blue Pippin (Sage Science). Sequencing  
431 was performed with the Pacific Biosciences version 2.0 binding kit and sequencing chemistry  
432 and a 10 hr runtime, resulting in 1,897,207 raw subreads equivalent to 127x genome coverage.

#### 433 **Optical mapping**

434 High molecular weight genomic DNA was extracted from *H. microstoma* using the BioRad CHEF  
435 Genomic Plug DNA kit as described under sample preparation. An optical map was produced  
436 using Bionano Genomics Irys®, using the BspQI enzyme. The Irys run generated 40 Gb of data  
437 >150 kb that was assembled de novo assembly into 126 contigs with a consensus N50 of 2.4  
438 Mb and coverage of 77x. Hybrid scaffolding of our manually improved Metassembler [49]  
439 assembly (below) produced a sequence assembly with 13 scaffolds totalling 165 Mb, along with  
440 7 repetitive scaffolds (4 Mb) that could not be reconciled with the optical map.

#### 441 **Genome assembly**

442 Two initial *de novo* assemblies were produced using PacBio data: the first used Canu 1.3 [50]  
443 and the second used HGAP4 [51], taking the corrected PacBio reads from the Canu assembly  
444 process as input. These assemblies were then passed to Metassembler for merging, using the  
445 HGAP4 assembly as the primary assembly and the Canu assembly as the secondary

446 assembly. The resulting sequence assembly was passed to Bionano's Hybrid (optical map)  
447 Scaffold. In addition, an Illumina-only SpAdes assembly was produced [52].

#### 448 **Manual genome improvement**

449 The genome was manually improved by examining the optical map data in Bionano's Access  
450 software and the sequence data in Gap5 [38]. Errors in the assembly were identified where  
451 scaffold breaks needed to be made, or places where new joins could be made. Where groups of  
452 Illumina reads mapped to contig ends without their mate-pair, the SpAdes assembly was queried  
453 to recover data missing from the assembly. All assembly edits resulting from such investigations  
454 were made in Gap5. Soft-clipped reads (PacBio and Illumina) at contig ends were also unclipped  
455 where they were found to be in agreement with each other. Many rounds of extending soft-  
456 clipped data, remapping, and checking, followed by further extension were undertaken and the  
457 results of these incremental improvements were fed back to the Hybrid Scaffold.

458         Significant changes to the assembly included breaking an incorrect chromosomal join  
459 made by Hybrid Scaffold and various scaffolding of repetitive scaffolds/contigs. Evidence  
460 included repeat junction counting, where repeats were scaffolded, in the absence of reads  
461 spanning their entire lengths, if there was only one junction from a non-repetitive region into the  
462 repeat at each end. Repeat motifs were analysed with NUCmer [53] and used to determine that  
463 many repetitive scaffolds fell into two main repeat types. The two long repeat regions were also  
464 joined by analysing their repeat-junctions. Subsequent inspection of these joins (encompassing  
465 the last 5 Mb of Chr1 and first 5 Mb of Chr3) in the context of the *E. multilocularis* and *S.*  
466 *mansonii* genomes was used to confirm that they were part of the same chromosome. Most  
467 repeat arrays (with the exception of telomeres and centromeres) were located on just one  
468 chromosome. A notable exception was a very large repeat occurring as a large complex array  
469 on two separate chromosomes; Chr1 around 38-40 Mb and Chr2 around 21-21.2 Mb. Optical  
470 contigs failed to bridge either of these repeats and it remains collapsed at both locations. In total  
471 there were four junctions from non-repetitive sequence into these repeats. In this instance, a

472 scaffold path was chosen that followed synteny with *E. multilocularis* and *S. mansoni*, given that  
473 only three real synteny breaks were found elsewhere.

474 Extensive optical alignment was used to confirm assembly accuracy (Fig. S6). Apart from  
475 three large repeat regions (A, B and rRNA repeat), effectively the entire genome had very good  
476 alignment with optical contigs. Some additional gaps remained in the alignments due to large  
477 repeats. Optical contigs were much shorter than sequence scaffolds due to a known issue  
478 whereby nick sites that occur close together on opposite strands introduce systematic double-  
479 stranded breaks that limit the contiguity of Bionano optical maps [54].

480 This assembly approach yielded the nuclear plus mitochondrial genomes with  $n = 7$  and  
481 with 85 sequence gaps remaining, most likely containing repetitive sequence. The mitochondrial  
482 contig was circularised to *Cox1* (Fig. S1).

### 483 **Gene finding and annotation**

484 Given the fragmented nature of the v1 assembly and questions around the veracity of the v2  
485 annotation set that had 2,000 additional gene models compared with either the v1 gene models  
486 or those for *E. multilocularis*, we opted to generate a *de novo* annotation with Braker2 [16] using  
487 RNA-seq data as input (for raw data accessions see S1.1 in [8]). RNA-seq reads were mapped  
488 to the genome using STAR v2.4.2a [55] and then a merged bam file of these reads was used as  
489 input to Braker2. Additionally, Repeat Modeller v1.0.11 [56] and Repeat Masker v1.331 [57]  
490 were run and the results used to filter out gene models with >97.5% of their length covered by  
491 repeat masked sequence. Annotation was loaded into Apollo [26] and manually assessed.  
492 Particular attention was paid to regions of the genome with the highest densities of gene models  
493 and it was noted that many of these models had fallen near to, but just below, the 97.5%  
494 threshold mentioned above, and upon inspection were generally found to result from incorrect  
495 annotation of gene models in tandem repeats and so were removed. OrthoMCL [58] was used to  
496 find one-to-one gene mappings between the resulting annotation and the previous v1 and v2  
497 gene models. Where unambiguous mappings were found, the historical gene IDs were  
498 transferred and are thus consistent with previous releases. Where mappings were ambiguous or

499 non-existent, new gene IDs were created prefixed with '003' (e.g. HmN\_003NNNNNN). The  
500 mitochondrial genome was annotated independently using MitoS2 [59].

501 The distribution of repeats were subsequently analysed using RepeatModeller (v1.0.11) followed  
502 by RepeatMasker (v4.0.7).

### 503 **Analysis of synteny conservation between flatworms**

504 The *S. mansoni* genome assembly v7 (PRJEA36577) and the latest *E. multilocularis* assembly  
505 were obtained from WBP (release 12). Translated alignments of 100 kb windows from each *H.*  
506 *microstoma* chromosome were compared against *E. multilocularis* using Promer v3.07 (--mum  
507 setting). Dot plots of synteny based on the position of orthologues was used to further  
508 characterise and more accurately determine the position of conserved synteny blocks. One-to-  
509 one orthologues were identified between *H. microstoma* and *E. multilocularis* as well as *H.*  
510 *microstoma* and *S. mansoni* using OrthoMCL v1.4 [58]. Each orthologue pair was plotted as a  
511 single point and coloured by the genomic location of the *E. multilocularis* and *S. mansoni* genes,  
512 respectively.

### 513 **Centromere quantification**

514 An attempt was made to quantify the centromeric repeat using Illumina data. One representative  
515 unit of the putative centromere sequence (179 bp) and another more specific to the repeat  
516 variant found on Chr2 (190 bp) were concatenated with the first 180 bp taken from 50 gene  
517 sequences. Using BEDTools [60] coverage, we calculated mean coverage over 10 bp windows  
518 for each gene sequence. The median of these mean values taken from all 50 genes was  
519 50.25x. The 179 bp unit had 1,549,563x coverage and the 190 bp unit had 6,237x coverage.  
520 From this, we calculated a grand total of 5.5 Mb which we take to be a minimum size estimate  
521 for this repeat, in line with the expectation that the centromere repeat is likely to be the largest  
522 repeat in the genome [37].

## 523 **Variant calling**

524 Variants were called using GATK Unified Genotyper v3.3.0 [61]. The raw variant set was initially  
525 filtered to flag variants as low quality if they met the following conditions: quality by depth (QD) <  
526 2; Fisher's test of strand bias (FS) > 60; RMS mapping quality (MQ) < 40; rank sum of alt  
527 versus reference mapping quality (MQRankSum) < -12.5; read position rank sum  
528 (ReadPosRankSum) < 8; read depth (DP) < 10. Variants were filtered further using vcftools  
529 (v0.1.14) [62] to exclude sites with low quality flags, minimize loci with missing data ("max-  
530 missing 0.8"), exclude indels ("remove-indels"), exclude SNPs with genotype quality (GQ) < 30,  
531 and ensure sites were biallelic ("min-alleles 2, max-alleles 2"). Remaining variants were  
532 manually curated in Gap5 [38] and a total of 52 were found to be genuine heterozygous calls,  
533 giving a SNP rate of 1 per 3.25 Mb. It was subsequently found that these SNPs could be isolated  
534 using the following GATK filtering parameters: qual > 120, DP < -4, dels > 55, HaploScore > 45,  
535 MapQualRankSum < 1.5, QD > 0.9, SOR > 6, ReadPosRankSum < -2.

## 536 **Identification of micro-exon genes**

537 Custom shell and Perl scripts were used to download and parse GFF-formatted annotation from  
538 WBP (July 2019) to create a table of exon lengths for each gene. The resulting table was further  
539 parsed to identify exons shorter than 70 nucleotides and divisible by three as micro-exons.  
540 Genes comprising at least seven exons, with micro-exons constituting at least half of all exons  
541 and runs of at least four consecutive micro-exons were deemed to be micro-exon genes. For  
542 more information see <https://github.com/wbazant/microexons/blob/master/README.md>.

## 543 **Identification of splice leader sequences and trans-spliced genes**

544 Publicly available RNA-seq libraries were used to identify splice leader sequences in *E.*  
545 *multilocularis* (run accessions: ERR337946, ERR337958, ERR337939, ERR337951,  
546 ERR337963, ERR337962), *S. mansoni* (run accessions: ERR022872, ERR022877,  
547 ERR022878, ERR022880, ERR022881, ERR022882, ERR1674583, ERR1674584,  
548 ERR1674585, ERR1674590, ERR1674591, ERR1674592, ERR506076, ERR506082,

549 ERR506083, ERR506084, ERR506084, ERR506088, ERR506090) and *H. microstoma*  
550 (ERR225719-ERR225730, ERR337928, ERR337940, ERR337952, ERR337964, ERR334976).  
551 TruSeq3 Illumina adapter sequences were trimmed from RNA-seq reads using  
552 Trimmomatic (v0.39) and reads aligned to the genome using STAR (v2.7.3a) with the following  
553 parameters: outFilterMultimapNmax 20, alignSJoverhangMin 8, alignSJDBoverhangMin 1,  
554 outFilterMismatchNmax 999, outFilterMismatchNoverReadLmax 0.04, alignIntronMin 20,  
555 alignIntronMax 1000000, and alignMatesGapMax 1000000. Annotations downloaded from WBP  
556 release 14 were provided to guide alignment. Unique alignments were parsed using a custom  
557 python script to identify reads that (a) aligned to annotated genes, or within 500 bp upstream,  
558 and (b) were soft clipped by more than 5 bp at the 5' end relative to the annotated gene. These  
559 soft clipped sequences from all libraries were then clustered (cd-hit-est v4.7) and three (*H.*  
560 *microstoma*) or one (*E. multilocularis*, *S. mansoni*) prominent clusters identified as putative  
561 splice leader (SL) sequences. Genes associated with clipped SL reads were considered to be  
562 putatively trans-spliced. Genomic splice leader loci were identified by aligning SL sequences  
563 against the genome using BLAST. Code is available at  
564 [https://github.com/fayerodgers/trans\\_splicing](https://github.com/fayerodgers/trans_splicing).

## 565 **Chromosomal FISH**

566 The asymmetric presence of telomeric repeats on the ends of the chromosomes was  
567 investigated empirically via chromosomal fluorescent *in situ* hybridisation (FISH). Chromosome  
568 spreads were performed based on the methods of Orosová and Špakulová [63]. Adult worms  
569 were freshly harvested from the bile-ducts of mice into plastic petri dishes, rinsed in mammalian  
570 saline (0.85% w/v NaCl) and incubated in supplemented media with colchicine (Sigma Aldrich)  
571 (M199, 20% foetal bovine serum (FBS), 1% sodium choleate, 0.25% colchicine) for 4 hr at 37°C  
572 in a 5% CO<sub>2</sub> atmosphere. They were transferred to distilled water, cut into pieces, pierced, and  
573 incubated for 20 min to allow the cells to swell. The swollen tissues were fixed in Carnoy's  
574 fixative (3:1 methanol:acetic acid) for 30 min and then stored in fixative at 4°C until used 24-48  
575 hr later. A small piece of worm (~1 mm) was put on a microscope slide and 15 µl cold acetic acid  
576 added before macerating the piece with needles. Slides were placed on a 45°C hotplate and the

577 cell suspension spread with a metal hook. Excess acetic acid was removed by blotting and the  
578 slides dehydrated in an ethanol series (70%, 80%, 90% and 100%) before air drying.

579 The protocol of Guo et al. [64] for chromosomal FISH was combined with tyramide signal  
580 amplification (TSA) for increased detection [65]. A 42 bp oligonucleotide based on the canonical  
581 telomere repeat ([TTAGGG] $\times$ 7) was synthesised commercially and then labelled with  
582 digoxigenin-11-2'-deoxyuridine-5'-triphosphate (DIG-11-dUTP) using terminal transferase  
583 (Roche) according to manufacturer's instructions. DIG-labelled probe was purified by sodium  
584 acetate and ethanol precipitation and re-suspended in 20  $\mu$ l water. For each slide, 1  $\mu$ l of probe  
585 was mixed with 250  $\mu$ l hybridisation buffer (50% formamide, 5x saline-sodium citrate buffer  
586 (SSC), 100  $\mu$ g/ml heparin, 1x Denhardt's solution, 0.1% Tween 20, 0.1% CHAPS, 10 mM EDTA,  
587 0.5 mg/ml bovine serum albumin (FBS), 5% dextran sulphate).

588 FISH assays were performed both by hand and using an Intavis InsituPro VSi *in situ*  
589 robot using 250  $\mu$ l volumes for each step except probe hybridisation, which used 200  $\mu$ l. Slides  
590 were incubated in hybridisation buffer for 10 min at RT, then 10 min at 70°C. Probe was  
591 hybridised at 70°C for 10 min, then cooled to RT and incubated for 12 hr. Slides were washed 6  
592 times for 5 min each with 2x SSC, 0.5x SSC, then TNT (100 mM Tris-HCl, 150 mM NaCl, 0.1%  
593 Tween20). They were then incubated with TNB (5% FBS in TNT) for 15 min before incubation  
594 with peroxidase-conjugated anti-DIG antibody (DIG-POD, Roche) 1:200 in TNB for 2 hr at RT.  
595 Slides were washed 6 times for 5 min with TNT, then twice each in phosphate buffered saline  
596 (PBS) with 0.1% Tween 20 and PBS with 0.1 M imidazole. Signal detection was performed by  
597 incubating in rhodamine-conjugated TSA mix (988  $\mu$ l PBS with 0.1 M imidazole, 10  $\mu$ l 0.1%  
598 H<sub>2</sub>O<sub>2</sub>, 2  $\mu$ l rhodamine-conjugated tyramide) for 5 min, then washed 6 times for 5 min each in  
599 PBST then TNT. Slides were lastly incubated in 1  $\mu$ g/ml DAPI for 15 min before being washed  
600 twice with TNT. The full InsituPro method is given in Additional file 2. Slides were removed from  
601 the robot and mounted with coverslips in 87.5% glycerol, 2.5% DABCO, 10% PBS and 1  $\mu$ g/ml  
602 DAPI. Results were visualised and imaged with a Nikon A1 confocal microscope using a 63x oil  
603 objective and Nikon NIS software v4, or a Leica DM5000B epifluorescent microscope using a

604 100x oil objective and Leica LAS software v4. Images were processed to adjust overall levels  
605 using Fiji/ImageJ v2 [66].

606

## 607 **Additional Files**

608 **Additional file 1:** Supplementary tables. **Table S1.** Chromosome summary. **Table S2.**

609 Comparison of one-to-one orthologues between assemblies and other flatworms. **Table S3.**

610 Gene model annotations and *Echinococcus multilocularis* orthologues. **Table S4.** Paralogous

611 expansions within orthologue groups predicted using successive *H. microstoma* genome

612 assembly versions. **Table S5.** Assessment of genome completeness based on

613 presence/absence of conserved eukaryotic genes. **Table S6.** Presence and absence of BUSCO

614 orthologues (v. 3.0.2) missing in  $\geq$  one flatworm. **Table S7.1.** Differentially expressed gene

615 models in Larvae vs. Whole Adult RNA-seq samples ranked by log<sub>2</sub>-fold change. **Table S7.2.**

616 Differentially expressed gene models in Scolex-Neck vs. Mid RNA-seq samples ranked by log<sub>2</sub>-

617 fold change. **Table S7.3.** Differentially expressed gene models in Scolex-Neck vs. End RNA-seq

618 samples ranked by log<sub>2</sub>-fold change. **Table S7.4.** Differentially expressed gene models in Mid

619 vs. End RNA-seq samples ranked by log<sub>2</sub>-fold change. **Table S7.5.** Intersect of gene models up-

620 regulated in the Scolex-Neck cf. Mid and End. **Table S7.6.** Intersect of gene models up-

621 regulated in the Mid cf. Scolex-Neck and End. **Table S7.7.** Intersect of gene models up-

622 regulated in the End cf. Mid and Scolex-Neck. **Table S8.** Repetitive elements summary. **Table**

623 **S9.** Repetitive element hotspots. **Table S10.** Micro-exon genes. **Table S11.** Trans-spliced

624 genes. **Table S12.** Chromosome fusions between *H. microstoma* and *E. multilocularis*. (XLSX

625 workbook; 4.7 MB)

626 **Additional file 2.** Method programme for automated chromosomal FISH using the Intavis

627 InsituPro VSi robot. (DOC; 45 KB)



628 **Additional file 3: Figure S1.** Mitochondrial genome. The 13,919 bp *Hymenolepis microstoma*  
629 mitochondrial genome was re-assembled from both short and long-read data, yielding over  
630 1000x coverage. The new assembly resolved the full length of a region involving a tandemly  
631 repeated 32 bp motif (cf. GenBank accession AP017665.1). This region is identified as one of  
632 three origins of replication-heavy strand (OH-a) by MITOS [59] and an adjacent hairpin-loop  
633 region as the origin of replication-light strand (OL). Gene order of ribosomal and protein-coding  
634 genes is consistent with the hypothesized ground-plan for the mitogenomes of parasitic  
635 flatworms as is the absence of the *atp8* gene [67]. (PDF; 1.2 MB)

636 **Additional File 4: Figure S2.** Repeat hotspots. Chromosomal positions of paralogous gene  
637 arrays. Abbreviations: ABCB: ATP binding cassette subfamily B; Akr1b4: Aldo keto reductase  
638 family 1 member B4; AP: Alkaline phosphatase; AQP: Aquaporin 4 ; CREBBP: CREB binding  
639 protein; DYNLL: Dynein light chain; Eif2c: Eukaryotic translation initiation factor 2c ; ENPP:  
640 Ectonucleotide pyrophosphatase:phosphodiesterase; EP45: Estrogen regulated protein EP45;  
641 GST: Glutathione S transferase; H3: Histone H3; HSP: heat shock protein; hypo: hypothetical  
642 protein; MVP: Major vault protein; PARP: Poly [ADP-ribose] polymerase; PiT: Phosphate  
643 transporter; PNP: Purine nucleoside phosphorylase; PP2A: Serine:threonine protein  
644 phosphatase 2A; PURA: PUR alpha protein; USP: Universal stress protein; RAD51: DNA repair  
645 protein RAD51 homolog; SLC22: Solute carrier family 33; TSP: Tetraspanin; TXN: Thioredoxin;  
646 ZNF: zinc finger protein. (PDF; 926 KB)

647 **Additional File 5. Figure S3.** Comparison of differentially expressed genes estimated from  
648 RNA-seq counts aligned to the v2 and v3 assemblies and gene models. Plots of log<sub>2</sub>-fold  
649 change show highly linear relationships across all sample comparisons, corroborating previous  
650 findings [8]. Only 11 genes (yellow), all with small fold-change values, were found to reverse  
651 directionality between assembly versions. (PDF; 6.9 MB)

652 **Additional File 6. Figure S4.** Comparison of RNA-seq sample counts against the v2 and v3  
653 assemblies and gene models. Principle component analyses (**A**) show tight clustering of sample  
654 replicates based on counts using both assemblies, while in the v3 (right) the Larvae, Scolex-

655 Neck and Whole Adult samples are arrayed only along PC1, with the transcriptome of the  
656 Scolex-Neck mid-way between those of the Larvae and Whole Adult samples. The Mid and End  
657 samples are further differentiated from the other samples along PC2. Heatmap clustering (**B**)  
658 shows that the transcriptome of the Scolex-Neck region is more similar to that of mid-  
659 metamorphose larvae than to middle or end regions of the adult worm, as discussed in [8].  
660 (PDF; 267 KB)

661 **Additional File 7. Figure S5.** Optical map contigs aligned to the genome assembly of the rRNA  
662 repeat array. Five contigs from the optical map are shown with the segment that aligns to the  
663 sequenced repeat indicated by coloured bars. The largest map contig (arrow) represents one  
664 haplotype containing the rRNA tandem repeat (pink bar) as well as the left (blue bar) and right  
665 (yellow bar) flanking regions. Other optical map contigs either contain the repeat together with  
666 either 5' or 3' flanking region, and likely represent an alternative haplotype, or have an  
667 insufficient amount of unique sequence to unambiguously determine their position within the  
668 repeat array. (PDF; 1.9 MB)

669 **Additional File 8. Figure S6.** Whole genome optical maps aligned to v3 assembly. Circled  
670 regions show where optical map data indicate alternative haplotypic versions. Regions labelled  
671 A and B, together with the rRNA array, represent the largest repeat regions where haplotype  
672 differences could account for visible length differences in sister chromatids (see text).  
673 Chromosomes are numbered and the positions of the telomeric repeats indicated by red dots.  
674 (PDF; 3 MB)

675 **Additional File 9. Figure S7.** Alignment of the N-terminal regions encoded by a tandem array of  
676 micro-exons genes located on Chr 6. The shared amino acid motif (consensus  
677 MRLFILLCFAVTLWAC) indicates that this gene array evolved through tandem duplication.  
678 (PDF; 1 MB)

679 **Additional File 10. Figure S8.** Spliced leader trans-splicing. (**A**) Clustering of sequences soft  
680 clipped from aligned RNA-seq reads. The most abundant clusters represent known (*E.*  
681 *multilocularis*, *S. mansoni*) or candidate (*H. microstoma*) splice leader (SL) sequences which are

682 given in the table below. **(B)** The prevalence of trans-splicing in different life stages and regions  
683 of the adult worm. Genes were considered trans-spliced if > 10 SL reads (SL1, SL2 or SL3)  
684 aligned across all libraries analysed. Of these genes, plot represents instances of at least one  
685 SL read aligning in each sample. Note that there are 5x as many genes trans-spliced in larvae  
686 than in the adult samples. Three replicates per sample. **(C)** An example of a gene  
687 (HmN\_000032200) that is trans-spliced in larval but not adult samples, visualised using Apollo.  
688 Left: track 1 shows a coverage plot of all aligned reads; track 2 represents alignments of  
689 uniquely-mapping soft-clipped reads (soft clipping represented by a thick blue bar at the end of  
690 the read). Arrow indicates accumulation of soft clipped reads at proposed SL-acceptor site.  
691 Right: Coverage plots of all aligned reads in three larval and three adult libraries. Arrows indicate  
692 proposed SL-acceptor sites present in the larval but not adult libraries. **(D)** Venn diagram of  
693 trans-spliced orthogroups shared between parasitic flatworms. (PDF; 5.6 MB)

694 **Additional File 11. Figure S9.** Multiple alignment of the terminal centromeric repeats of each  
695 chromosome. 26 consecutive repeat copies were taken from a single location at the end of each  
696 of the six chromosomes in turn and aligned in order (top 26 = Chr1, next 26 = Chr2 etc.). Strong  
697 conservation of the 179mer centromeric repeat is seen across all chromosomes except Chr2  
698 which shows a second novel repeat type. However, searching within the whole of the Chr2  
699 repeat array shows that the 'canonical' 179mer observed in the other aligned reads is found with  
700 100% coverage and identity. The terminal array on Chr2 is also much larger than those of the  
701 other chromosomes and is interspersed with various other repeats not shown here. Full  
702 assembly of the Chr2 terminal array is not resolvable without longer sequencing reads. Notably,  
703 when the centrosomal repeat arrays are oriented at the same end of each chromosome their  
704 sequences are found to be in alignment. (PDF; 1.7 MB)

705 **Additional File 12. Figure S10.** The terminal centromeric repeat of chromosome 2. A dotter plot  
706 shows that the centromeric repeat not only contains a second dominant repeat motif but is also  
707 interspersed with other repetitive elements, unlike the other chromosomes that exhibit a tandem  
708 array comprised entirely of the novel 179mer. Within the interstitial sequences we find the top

709 blastx hit to Gag-Pol polyprotein, indicating the centromere has been invaded by transposable  
710 elements. (PDF; 3.9 MB)

711

## 712 **Declarations**

### 713 **Ethics approval and consent to participate**

714 Animals were used in accordance with project license PPL70/8684 issued by the UK Home  
715 Office to PDO.

### 716 **Consent for publication**

717 Not applicable

### 718 **Availability of data and material**

719 The datasets generated and/or analysed during the current study are available in the European  
720 Nucleotide Archive ([www.ebi.ac.uk/ena](http://www.ebi.ac.uk/ena)) under the following accessions; genome assembly  
721 GCA\_000469805.3, long read sequence data study accession PRJEB2107.

### 722 **Competing interests**

723 The authors declare that they have no competing interest.

### 724 **Funding**

725 This work was supported by Wellcome (grant 206194) to AT, NEH and MB; BBSRC grant  
726 BB/M003949/1 to SRD and BBSRC grant MR/L001020/1 to FHR.

### 727 **Authors' contributions**

728 AT, PDO and MB conceived and designed the study. AT assembled and manually curated the  
729 genome and led bioinformatic analyses; AB prepared samples and performed chromosomal in

730 situ hybridisation; KJ conducted differential expression analyses; FHR analysed spliced leader  
731 trans-splicing; SRD performed preliminary analyses of synteny and advised on annotation and  
732 analytical approaches; NEH coordinated the specimens and sequencing; AT, AB, PDO and MB  
733 interpreted results and prepared the paper which was led by PDO and AT. All authors read and  
734 approved the final manuscript.

735

## 736 **References**

- 737 1. Berriman M, Wilson RA, Dillon GP, Cerqueira GC, Ashton PD, Aslett MA, et al. The genome  
738 of the blood fluke *Schistosoma mansoni*. *Nature*. 2009;460:352–8.
- 739 2. Young ND, Jex AR, Li B, Liu S, Yang L, Xiong Z, et al. Whole-genome sequence of  
740 *Schistosoma haematobium*. *Nat Genet*. 2012;44:221–5.
- 741 3. Wang X, Chen W, Huang Y, Sun J, Men J, Liu H, et al. The draft genome of the carcinogenic  
742 human liver fluke *Clonorchis sinensis*. *Genome Biol*. 2011;12:R107.
- 743 4. Young ND, Nagarajan N, Lin SJ, Korhonen PK, Jex AR, Hall RS, et al. The *Opisthorchis*  
744 *viverrini* genome provides insights into life in the bile duct. *Nature Communications*. Nature  
745 Publishing Group; 2014;5:1–11.
- 746 5. Olson PD, Zarowiecki M, Kiss F, Brehm K. Cestode genomics - progress and prospects for  
747 advancing basic and applied aspects of flatworm biology. *Parasite Immunol*. 2012;34:130–50.
- 748 6. Tsai IJ, Zarowiecki M, Holroyd N, Brooks KL, Tracey A, Bobes RJ, et al. The genomes of four  
749 tapeworm species reveal adaptations to parasitism. *Nature*. 2013;496:57–63.
- 750 7. Protasio AV, Tsai IJ, Babbage A, Nichol S, Hunt M, Aslett MA, et al. A systematically  
751 improved high quality genome and transcriptome of the human blood fluke *Schistosoma*  
752 *mansoni*. *PLoS Negl Trop Dis*. 2012;6:e1455–13.

- 753 8. Olson PD, Zarowiecki M, James K, Baillie A, Bartl G, Burchell P, et al. Genome-wide  
754 transcriptome profiling and spatial expression analyses identify signals and switches of  
755 development in tapeworms. *EvoDevo*. BioMed Central; 2018;9:1–29.
- 756 9. Jex AR, Gasser RB, Schwarz EM. Transcriptomic resources for parasitic nematodes of  
757 veterinary importance. *Trends Parasitol*. Elsevier Ltd; 2019;35:72–84.
- 758 10. Grote A, Lustigman S, Ghedin E. Lessons from the genomes and transcriptomes of filarial  
759 nematodes. *Mol Biochem Parasitol*. 2017;215:23–9.
- 760 11. Howe KL, Bolt BJ, Shafie M, Kersey P, Berriman M. WormBase ParaSite – a comprehensive  
761 resource for helminth genomics. *Mol Biochem Parasitol*. Elsevier B.V; 2017;215:2–10.
- 762 12. International Helminth Genomes Consortium, Coghlan A, Mitreva M, Berriman M.  
763 Comparative genomics of the major parasitic worms. *Nat Genet*. 2018;:1–35.
- 764 13. Cunningham LJ, Olson PD. Description of *Hymenolepis microstoma* (Nottingham strain): a  
765 classical tapeworm model for research in the genomic era. *Parasites & Vectors*. 2010;3:123.
- 766 14. Proffitt MR, Jones AW. Chromosome analysis of *Hymenolepis microstoma*. *Exp Parasitol*.  
767 1969;25:72–84.
- 768 15. Hossain M, Jones A. The chromosomes of *Hymenolepis microstoma* (Dujardin 1845). *J*  
769 *Parasitol*. 1963;49:305–7.
- 770 16. Hoff KJ, Lange S, Lomsadze A, Borodovsky M, Stanke M. BRAKER1: Unsupervised RNA-  
771 seq-based genome Annotation with GeneMark-ET and AUGUSTUS. *Bioinformatics*.  
772 2016;32:767–9.
- 773 17. Bray NL, Pimentel H, MELSTED P, Pachter L. Near-optimal probabilistic RNA-seq  
774 quantification. *Nat. Biotechnol*. 2016;34:525–7.
- 775 18. Emms DM, Kelly S. OrthoFinder: phylogenetic orthology inference for comparative  
776 genomics. *Genome Biol*. *Genome Biology*; 2019;20:1–14.

- 777 19. Waterhouse RM, Seppey M, Simao FA, Manni M, Ioannidis P, Klioutchnikov G, et al.  
778 BUSCO applications from quality assessments to gene prediction and phylogenomics. *Mol Biol*  
779 *Evol.* 2017;35:543–8.
- 780 20. Lynch M. The origins of genome architecture. Sinauer Associates Incorporated; 2007.
- 781 21. Canapa A, Barucca M, Biscotti MA, Forconi M, Olmo E. Transposons, genome size, and  
782 evolutionary insights in animals. *Cytogenet Genome Res.* 2016;147:217–39.
- 783 22. Volfovsky N, Haas BJ, Salzberg SL. Computational discovery of internal micro-exons.  
784 *Genome Res.* 2003;13:1216–21.
- 785 23. DeMarco R, Mathieson W, Manuel SJ, Dillon GP, Curwen RS, Ashton PD, et al. Protein  
786 variation in blood-dwelling schistosome worms generated by differential splicing of micro-exon  
787 gene transcripts. *Genome Res.* 2010;20:1112–21.
- 788 24. Brehm K, Frosch M, Jensen K. mRNA trans-splicing in the human parasitic cestode  
789 *Echinococcus multilocularis*. *J Biol Chem.* 2000;275:38311–8.
- 790 25. Boroni M, Sammeth M, Grossi Gava S, Andressa Nogueira Jorge N, Mara Macedo A,  
791 Machado CR, et al. Landscape of the spliced leader trans-splicing mechanism in *Schistosoma*  
792 *mansoni*. *Sci Rep.* Springer US; 2018;8:1–14.
- 793 26. Lee E, Harris N, Gibson M, Chetty R, Lewis SE. Apollo: a community resource for genome  
794 annotation editing. *Bioinformatics.* 2009;25:1836–7.
- 795 27. Stover NA, Katsanis N, Cavalcanti ARO. Spliced leader trans-splicing. *Curr Biol.*  
796 2006;16:R8–9.
- 797 28. Krchňáková Z, Krajčovič J, Vesteg M. On the possibility of an early evolutionary origin for the  
798 spliced leader trans-splicing. *J Mol Evol.* Springer US; 2017;85:37–45.
- 799 29. Douris V, Telford MJ, Averof M. Evidence for multiple independent origins of trans-splicing in  
800 Metazoa. *Mol Biol Evol.* 2010;27:684–93.

- 801 30. Rossi A, Ross E, Jack A, Sánchez Alvarado A. Molecular cloning and characterization of  
802 SL3: A stem cell-specific SL RNA from the planarian *Schmidtea mediterranea*. *Gene*.  
803 2014;533:156–67.
- 804 31. Koziol U, Jarero F, Olson PD, Brehm K. Comparative analysis of Wnt expression identifies a  
805 highly conserved developmental transition in flatworms. *BMC Biol. BioMed Central*; 2016;14:10.
- 806 32. Tandonnet S, Koutsovoulos GD, Adams S, Cloarec D, Parihar M, Blaxter M, et al.  
807 Chromosome-wide evolution and sex determination in the three-sexed nematode *Auanema*  
808 *rhodensis*. *G3*. 2019;g3.0011.2019–20.
- 809 33. Rausch VR, Rausch RL. The karyotype of *Echinococcus multilocularis* (Cestoda: Taeniidae).  
810 *Can. J. Genet. Cytol.* 1981;23:151–4.
- 811 34. Pryde FE, Gorham HC, Louis E. Chromosome ends: all the same under their caps. *Curr*  
812 *Opin Genet Dev.* 1997;7:822–8.
- 813 35. Shelby RD, Vafa O, Sullivan KF. Assembly of CENP-A into centromeric chromatin requires a  
814 cooperative array of nucleosomal DNA contact sites. *J. Cell Biol.* Rockefeller University Press;  
815 1997;136:501–13.
- 816 36. Hartley G, O'Neill R. Centromere repeats: hidden gems of the genome. *Genes*.  
817 2019;10:223–22.
- 818 37. Melters DP, Bradnam KR, Young HA, Telis N, May MR, Ruby JG, et al. Comparative  
819 analysis of tandem repeats from hundreds of species reveals unique insights into centromere  
820 evolution. *Genome Biol. BioMed Central Ltd*; 2013;14:R10.
- 821 38. Bonfield JK, Whitwham A. Gap5--editing the billion fragment sequence assembly.  
822 *Bioinformatics.* 2010;26:1699–703.
- 823 39. Nielsen L, Edström JE. Complex telomere-associated repeat units in members of the genus  
824 *chironomus* evolve from sequences similar to simple telomeric repeats. *Mol Cell Biol. American*



- 825 Society for Microbiology (ASM); 1993;13:1583–9.
- 826 40. Mason JM, Biessmann H. The unusual telomeres of *Drosophila*. Trends Genet. 1995;11:58–  
827 62.
- 828 41. McKinley KL, Cheeseman IM. The molecular basis for centromere identity and function. Sci  
829 Rep. Nature Publishing Group; 2015;17:16–29.
- 830 42. Saint-Leandre B, Levine MT. The telomere paradox: stable genome preservation with rapidly  
831 evolving proteins. Trends Genet. Elsevier Ltd; 2020;:1–11.
- 832 43. Olovnikov AM. A theory of marginotomy. The incomplete copying of template margin in  
833 enzymic synthesis of polynucleotides and biological significance of the phenomenon. J Theor  
834 Biol. 1973;41:181–90.
- 835 44. Victorelli S, Passos JF. Telomeres and cell senescence - size matters not. EBioMedicine.  
836 The Authors; 2017;21:14–20.
- 837 45. Tan TCJ, Rahman R, Jaber-Hijazi F, Felix DA, Chen C, Louis EJ, et al. Telomere  
838 maintenance and telomerase activity are differentially regulated in asexual and sexual worms.  
839 Proc Natl Acad Sci USA. 2012;109:4209–14.
- 840 46. Henikoff S, Ahmad K, Malik HS. The centromere paradox: stable inheritance with rapidly  
841 evolving DNA. Science. American Association for the Advancement of Science; 2001;293:1098–  
842 102.
- 843 47. Bracewell R, Chatla K, Nalley MJ, Bachtrog D. Dynamic turnover of centromeres drives  
844 karyotype evolution in *Drosophila*. eLife. 2019.
- 845 48. James K, Olson PD. The tapeworm interactome: inferring confidence scored protein-protein  
846 interactions from the proteome of *Hymenolepis microstoma*. BMC Genomics. 2020;:1–20.
- 847 49. Wences AH, Schatz MC. Metassembler: merging and optimizing de novo genome  
848 assemblies. Genome Biol. Genome Biology; 2015;16:1–10.

- 849 50. Koren S, Walenz BP, Berlin K, Miller JR, Bergman NH, Phillippy AM. Canu: scalable and  
850 accurate long-read assembly via adaptive k-mer weighting and repeat separation. *Genome Res.*  
851 2017;27:722–36.
- 852 51. Chin C-S, Alexander DH, Marks P, Klammer AA, Drake J, Heiner C, et al. Nonhybrid,  
853 finished microbial genome assemblies from long-read SMRT sequencing data. *Nat Meth.*  
854 2013;10:563–9.
- 855 52. Bankevich A, Nurk S, Antipov D, Gurevich AA, Dvorkin M, Kulikov AS, et al. SPAdes: a new  
856 genome assembly algorithm and its applications to single-cell sequencing. *J Comp Biol.*  
857 2012;19:455–77.
- 858 53. Kurtz S, Phillippy A, Delcher AL, Smoot M, Shumway M, Antonescu C, et al. Versatile and  
859 open software for comparing large genomes. *Genome Biol.* 2004;5:R12–9.
- 860 54. Staňková H, Hastie AR, Chan S, Vrána J, Tulpová Z, Kubaláková M, et al. BioNano genome  
861 mapping of individual chromosomes supports physical mapping and sequence assembly in  
862 complex plant genomes. *Plant Biotechnol J.* 2016;14:1523–31.
- 863 55. Dobin A, Davis CA, Schlesinger F, Drenkow J, Zaleski C, Jha S, et al. STAR: ultrafast  
864 universal RNA-seq aligner. *Bioinformatics.* 2013;29:15–21.
- 865 56. Flynn JM, Hubley R, Goubert C, Rosen J, Clark AG, Feschotte C, et al. RepeatModeler2:  
866 automated genomic discovery of transposable element families. 19:378. Available from:  
867 [www.repeatmasker.org](http://www.repeatmasker.org)
- 868 57. Flynn JM, Hubley R, Goubert C, Rosen J, Clark AG, Feschotte C, et al. RepeatModeler2:  
869 automated genomic discovery of transposable element families. *bioRxiv. Cold Spring Harbor*  
870 *Laboratory;* 2019;19:856591.
- 871 58. Li L, Stoeckert CJ, Roos DS. OrthoMCL: identification of ortholog groups for eukaryotic  
872 genomes. *Genome Res. Cold Spring Harbor Lab;* 2003;13:2178–89.

- 873 59. Bernt M, Donath A, Jühling F, Externbrink F, Florentz C, Fritsch G, et al. MITOS: Improved  
874 de novo metazoan mitochondrial genome annotation. *Mol Phylogenet Evol.* Elsevier Inc;  
875 2013;69:313–9.
- 876 60. 14 GRCII42O211. BEDTools: a flexible suite of utilities for comparing genomic features.  
877 *Bioinformatics.* 2010;26:841–2.
- 878 61. McKenna A, Hanna M, Banks E, Sivachenko A, Cibulskis K, Kernytsky A, et al. The Genome  
879 Analysis Toolkit: a MapReduce framework for analyzing next-generation DNA sequencing data.  
880 *Genome Res.* Cold Spring Harbor Lab; 2010;20:1297–303.
- 881 62. Danecek P, Auton A, Abecasis G, Albers CA, Banks E, DePristo MA, et al. The variant call  
882 format and VCFtools. *Bioinformatics.* 2011;27:2156–8.
- 883 63. Orosová M, Špakulová M. Tapeworm chromosomes: their value in systematics with  
884 instructions for cytogenetic study. *Folia Parasit. Folia Parasitologica;* 2018;65:1–8.
- 885 64. Guo L, Accorsi A, He S, Guerrero-Hernández C, Sivagnanam S, McKinney S, et al. An  
886 adaptable chromosome preparation methodology for use in invertebrate research organisms.  
887 *BMC Biol. BMC Biology;* 2018;16:1–14.
- 888 65. Hopman AH, Ramaekers FCS, Speel EJ. Rapid synthesis of biotin-, digoxigenin-,  
889 trinitrophenyl-, and fluorochrome-labeled tyramides and their application for In situ hybridization  
890 using CARD amplification. *J Histochem Cytochem.* SAGE Publications; 1998;46:771–7.
- 891 66. Schindelin J, Arganda-Carreras I, Frise E, Kaynig V, Longair M, Pietzsch T, et al. Fiji: an  
892 open-source platform for biological-image analysis. *Nat Meth.* 2012;9:676–82.
- 893 67. Egger B, Bachmann L, Fromm B. Atp8 is in the ground pattern of flatworm mitochondrial  
894 genomes. *BMC Genomics.* BMC Genomics; 2017;18:1–10.
- 895

## 896 **Tables**

897 **Table 1** Assembly metrics among *Hymenolepis microstoma* genome releases

898

## 899 **Figure legends**

900 **Fig. 1** Idiogram of *Hymenolepis microstoma* chromosomes. **(A)** Each chromosome is depicted  
901 by three horizontal tracks showing the positions of coding regions, repeats and synteny relative  
902 to *Echinococcus multilocularis* (shown in **B**). Synteny is based on 100 kb windows, coloured  
903 according to the *E. multilocularis* chromosome with the greatest total number of residues  
904 matching using Promer (Methods). Where no hits were found, we coloured the window grey.  
905 Above the tracks a graph shows the depth of coverage of Illumina reads mapped against the  
906 assembly. Single nucleotide polymorphisms (SNP) shown as red vertical lines along the  
907 sequence coverage graph. Red horizontal bars show two interruptions in synteny on Chr1 that  
908 reveal a misassembly in the *E. multilocularis* reference genome (see text). Positions of telomeric  
909 and centromeric repeat arrays that the chromosome ends are indicated. Regions identified as  
910 having enriched pfam clusters are numbered. Regions underscored with horizontal bars and  
911 labelled A, B and rRNA depict large repeat arrays discussed in the text. **(B)** shows *H.*  
912 *microstoma* assembly scaffolds aligned against those of *E. multilocularis*.

913

914 **Fig. 2** Distribution of transposable elements. **(A)** Transposable elements classified by  
915 RepeatModeller (v1.0.11). **(B)** Additional unclassified elements.

916

917 **Fig. 3** Chromosomal synteny among parasitic flatworms. Comparison between the tapeworms  
918 *Hymenolepis microstoma* and *Echinococcus multilocularis* **(A)** shows a high level of synteny not  
919 only of scaffold occupancy among the chromosomes, but also of their arrangement within  
920 chromosomes, as indicated by their positions arrayed along the diagonal. Comparison between

921 tapeworms and the human blood fluke *Schistosoma mansoni*. **(B)** shows a high level of  
922 conservation among chromosomes, but within chromosomes there is little apparent synteny  
923 among the scaffolds. In **(C)** their chromosomes are represented by the deduced ancestral  
924 linkage groups ('Nigon' units) from which we infer that the *H. microstoma* karyotype resulted  
925 from the fusion of individual chromosomes still present in *E. multilocularis* and *S. mansoni*.

926

927 **Fig. 4** Chromosomal FISH of telomere repeats. Both panels show chromosomal fluorescent in  
928 situ hybridisation using probes against the canonical telomere sequence (TTAGGGx7). **(A)** In  
929 haploid spermatozoa only one foci is visible for each of the six chromosomes (arrows), whereas  
930 two foci per chromosome (= 12) would be expected if telomeric repeats were present on both  
931 ends. **(B)** A metaphase figure shows chromatids joined at their centromeric ends, which lack  
932 probe signal, whereas probe is visible at the opposing ends of each sister chromatid (arrows).

**Table 1** Assembly metrics among *Hymenolepis microstoma* genome releases

|                                                         | v1            | v2            | v3            |
|---------------------------------------------------------|---------------|---------------|---------------|
| Public release                                          | 2013          | 2015          | 2018          |
| Size (Mb)                                               | 141           | 182           | 169           |
| Ungapped size (Mb)                                      | 138           | 161           | 163           |
| Scaffolds (including mitochondrion)                     | 1,132         | 3,643         | 7             |
| N count (size of gaps)                                  | 2,484,793     | 21,388,553    | 6,486,653     |
| Gaps                                                    | 3,343         | 3,767         | 85            |
| Scaffold N50 (Mb)                                       | 0.539         | 7.673         | 25.8          |
| N90 (Mb)                                                | 0.082         | 0.040         | 17.5          |
| Contigs                                                 | 4,475         | 7,410         | 92            |
| Contig N50 (Mb)                                         | 0.075         | 0.063         | 5.81          |
| N90 (Mb)                                                | 0.016         | 0.010         | 1.21          |
| GC content                                              | 36%           | 36%           | 36%           |
| Gene models                                             | 10,241        | 12,368        | 10,139        |
| Transcripts including splice variants                   | 10,283        | 12,373        | 11,429        |
| Avg. gene length (bp)                                   | 1,478         | 1,398         | 1,930         |
| Exons/introns                                           | 65,209/54,968 | 74,137/61,693 | 90,693/79,262 |
| Avg. exons per transcript                               | 6.3           | 6.0           | 7.9           |
| Avg. intron length (bp)                                 | 863           | 851           | 866           |
| Avg. exon length (bp)                                   | 214           | 233           | 217           |
| RNA-seq reads mapped to transcriptome                   | 99,295,156    | 104,204,808   | 109,485,265   |
| Transcripts with <10 RNA-seq reads mapping              | 1,116         | 1,513         | 563           |
| Transcripts with no RNA-seq read mapping                | 568           | 707           | 193           |
| 1:1 orthologues with <i>Echinococcus multilocularis</i> | 5,710         | 5,967         | 6,299 (62%)   |
| 1:1 orthologues with <i>Schistosoma mansoni</i>         | 4,403         | 4,539         | 4,801 (47%)   |

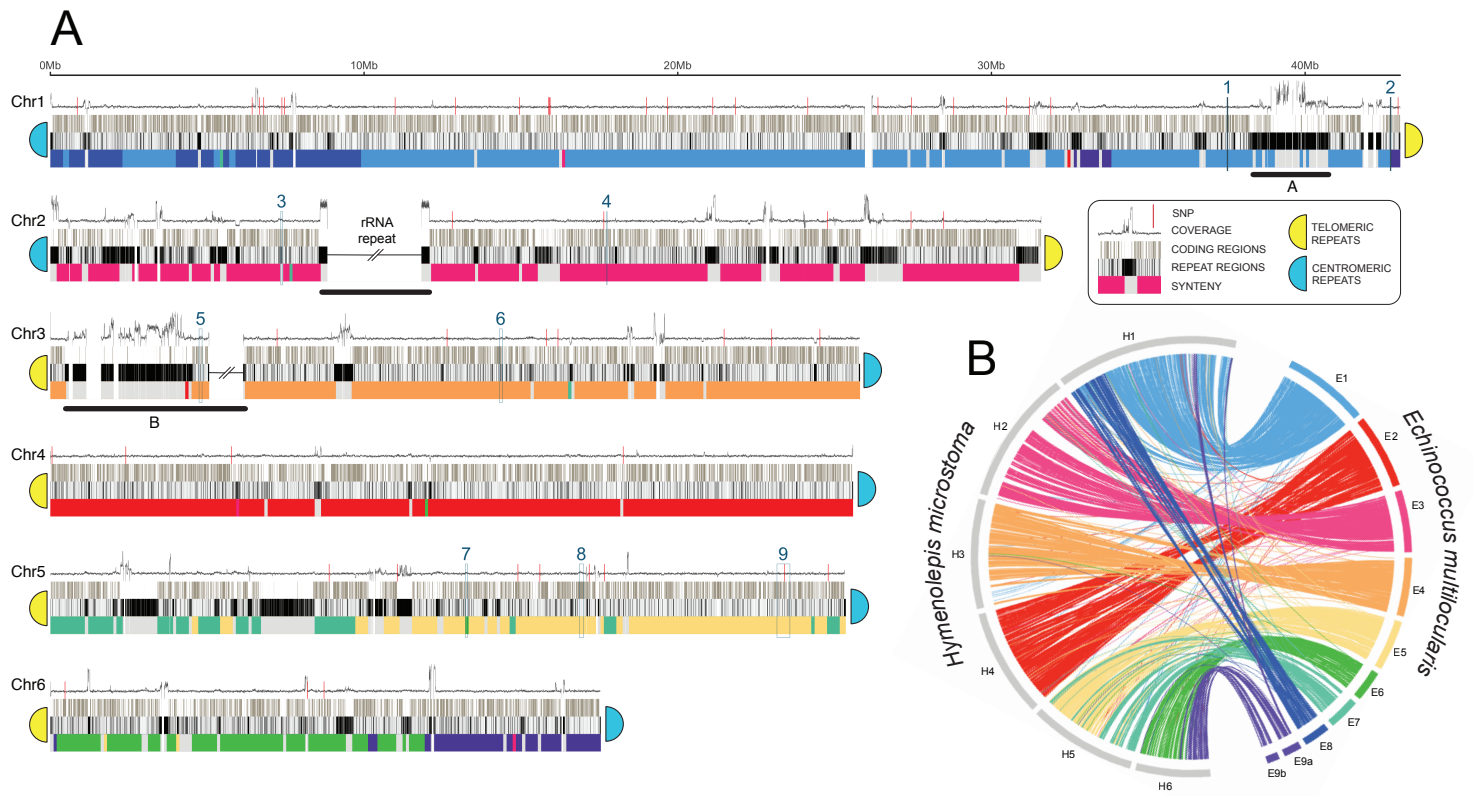

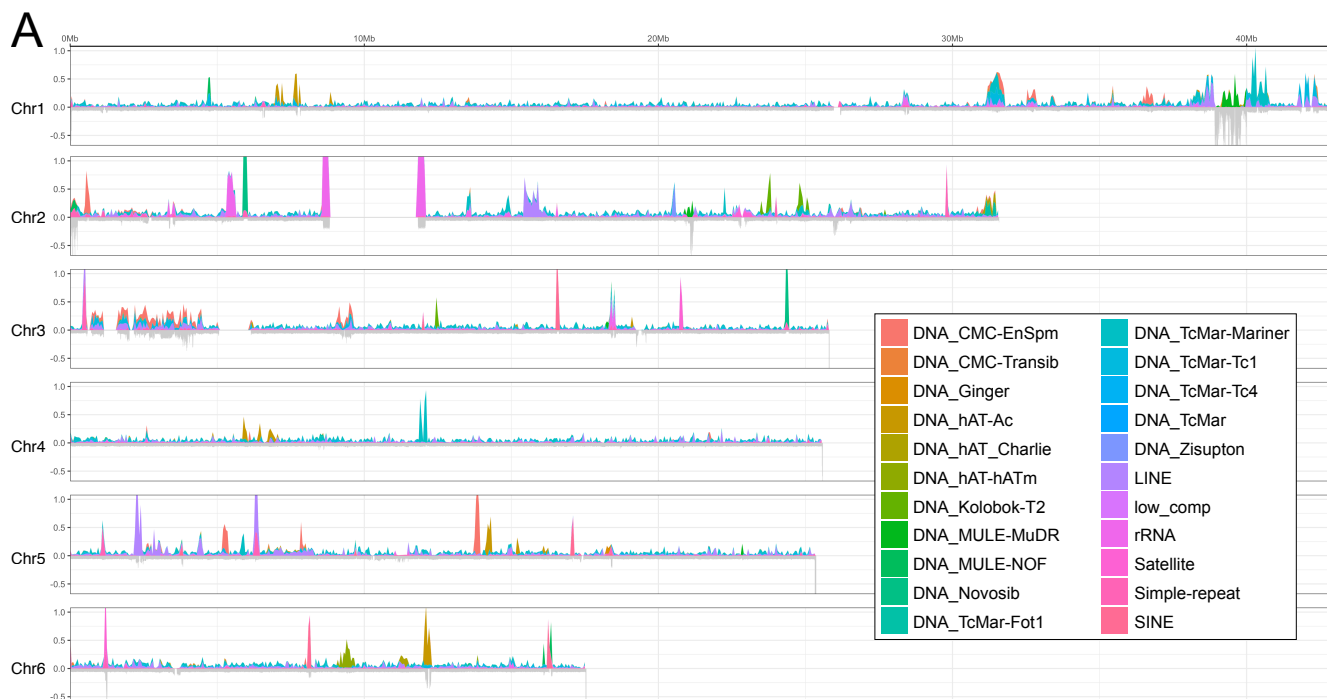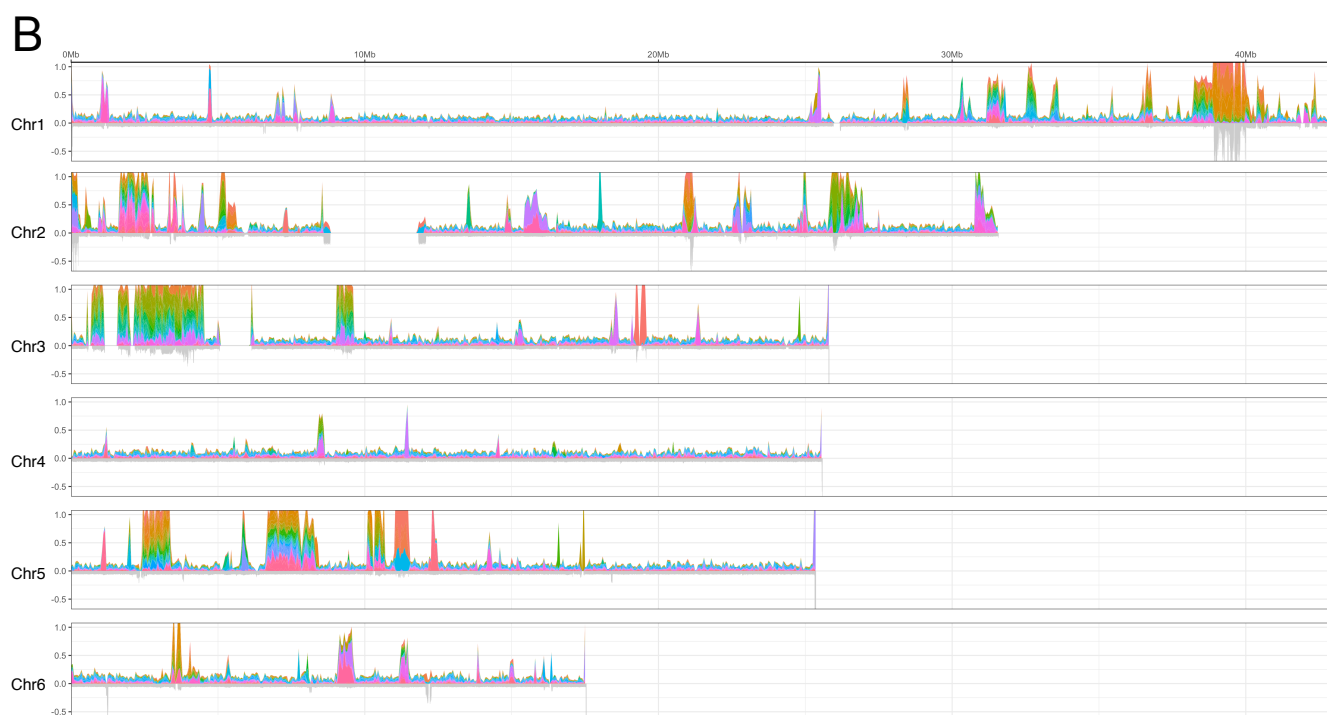



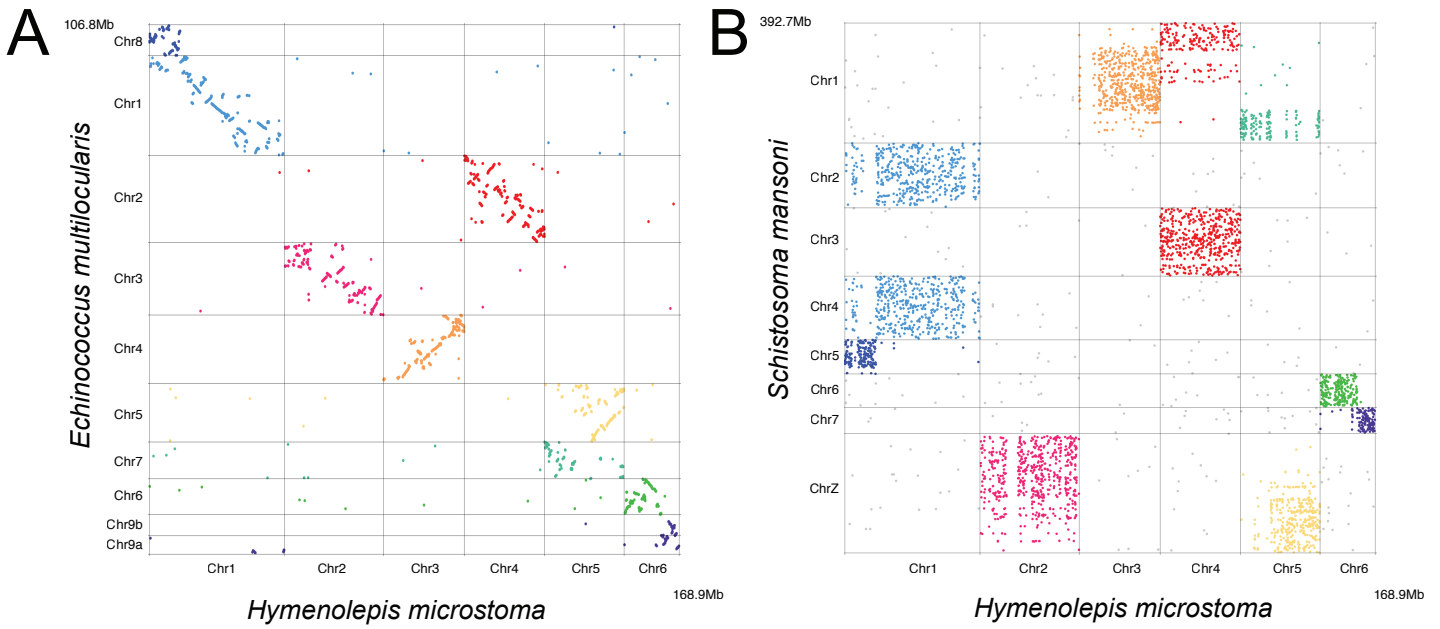

**C**

OBSERVED KARYOTYPES

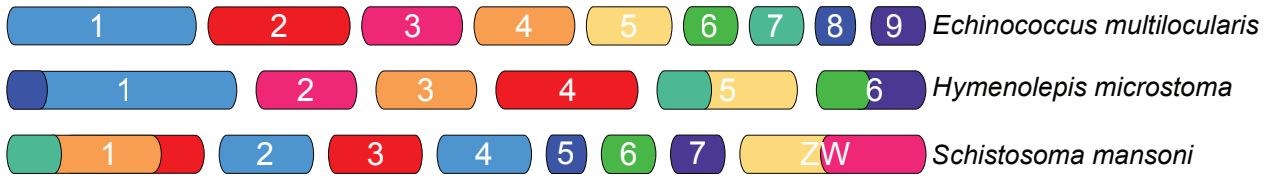

SYNTENY BLOCKS

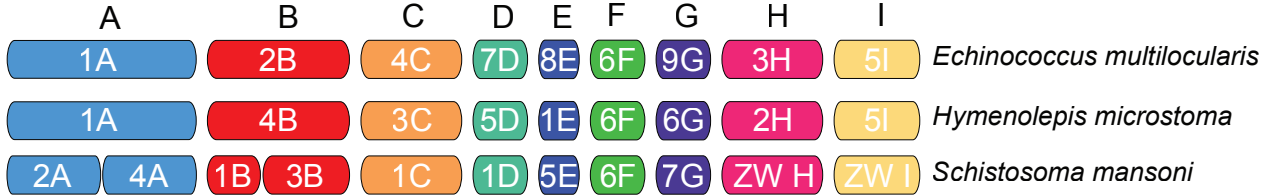

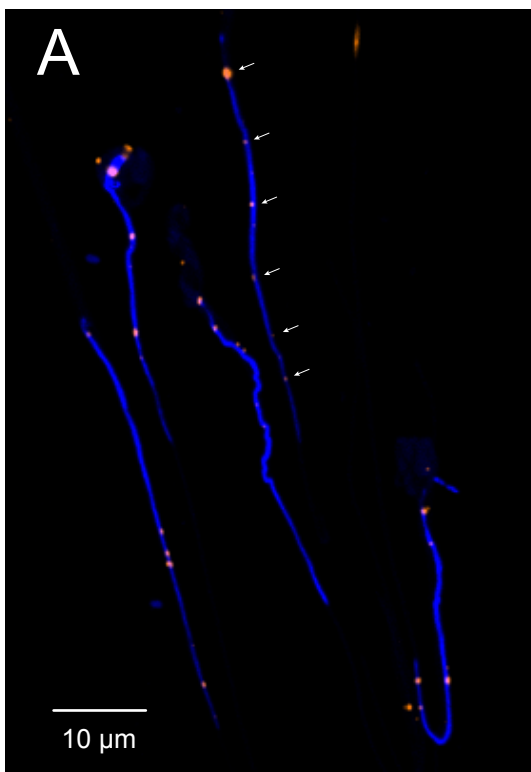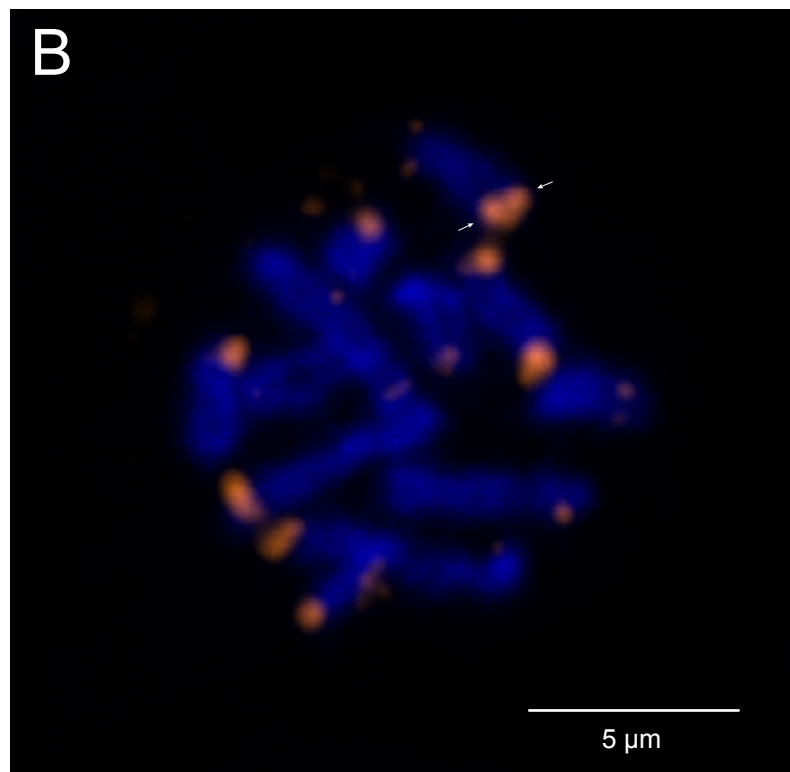

Source: https://www.biorxiv.org/content/biorxiv/early/2020/04/09/2020.04.08.031872.full.pdf
