# Supplementary material for: Complete representation of a tapeworm genome reveals chromosomes capped by centromeres, necessitating a dual role in segregation and protection
Source: bioRxiv or medRxiv preprint supplement (doi:10.1101/2020.04.08.031872), 2020-04-09
Supplement: Supplementary file [file media-2.pdf]

\*\*\*\*\* method-listing: Telomere TSA FISH 040419.IPM \*\*\*\*\*

\*\*\*\*\* path: C:\INTAVIS\Software\InsituPro VSi 4.2\Methods\Methods  
Slides\  
\*\* 08.04.2019 - 15:03:17

\*\* Software : InsituProVSi  
\*\* Version : 29.05.2017

\*\*\*\*\* configuration: InsituPro VSi-TSd.IPC \*\*\*\*\*

\*\*\*\*\* path: C:\INTAVIS\Software\InsituPro VSi 4.2\  
\* XYZRoboter - Gilson 223

- Drain / Rinse / Home X / Y / Z -

|         |       |       |        |        |       |
|---------|-------|-------|--------|--------|-------|
| Home :  | X:270 | Y:205 | Z:0    | F:0    | 0.1mm |
| Drain : | X:270 | Y:205 | Z:300  | F:300  | 0.1mm |
| Rinse : | X:275 | Y:530 | Z:1080 | F:1080 | 0.1mm |

- change Needle -

|            |     |     |     |     |       |
|------------|-----|-----|-----|-----|-------|
| position : | X:0 | Y:0 | Z:0 | F:0 | 0.1mm |
|------------|-----|-----|-----|-----|-------|

\* Dilutor - Gilson 402

- Identification : -

Alias : [empty => unit-nb]

- Configuration -

|                  |       |    |
|------------------|-------|----|
| dilutor syringe: | 10000 |    |
| transfertube:    | 10100 | ul |

- Pipetting -

|                               |      |        |
|-------------------------------|------|--------|
| reservoir aspiration :        | 30   | ml/min |
| MANUAL prime speed:           | 72   | ml/min |
| Reservoir-Volume:             | 2000 | ml     |
| aspiration speed LOW:         | 10   | ml/min |
| aspiration speed MEDIUM:      | 15   | ml/min |
| aspiration speed HIGH:        | 20   | ml/min |
| dispense speed LOW:           | 10   | ml/min |
| dispense speed MEDIUM:        | 15   | ml/min |
| dispense speed HIGH:          | 20   | ml/min |
| inside rinse vol. NORMAL:     | 700  | µl     |
| inside rinse vol. INTENSIVE:  | 1400 | µl     |
| outside rinse vol. NORMAL:    | 700  | µl     |
| outside rinse vol. INTENSIVE: | 1400 | µl     |
| rinse dispense speed LOW:     | 20   | ml/min |
| rinse dispense speed HIGH:    | 30   | ml/min |

(System: Slides)

\* ThermContr - WEST 6100+

- Identification : -

Alias : [empty => unit-nb]

- Method -

- Contacts -

|                   |   |      |
|-------------------|---|------|
| output cool-fan : | 4 | 1..4 |
|-------------------|---|------|

\*\*\*\*\* method \*\*\*\*\*

|     |                 |                       |
|-----|-----------------|-----------------------|
| 1   | Module          | Starting Method       |
| 1.1 | XYZCheck        |                       |
| 1.2 | SetTempReg to : | OFF                   |
| 1.3 | PrimeNeedle     | 12000µl               |
| 1.4 | PrimePort       | 10000µl Port 1->Drain |
| 1.5 | PrimePort       | 10000µl Port 2->Drain |
| 1.6 | PrimeTub        | 60000µl               |

```
...
2      Module      Hybridization
2.1    SetTempReg  to : 70°C
2.2    IncubateTS  00:10 250µl Hyb Mix->Slides
2.3    SetTempReg  "to : 70°C, <30min"
2.4    IncubateTS  00:10 250µl Hyb Mix->Slides
2.5    PrimeTub    60000µl
2.6    IncubateTS  00:30 200µl Probe->Slides
2.7    SetTempReg  to : RT
2.8    Wait 12 h
2.9    PrimeTub    60000µl
2.10   IncubateTS  00:05 250µl 2x SSC->Slides 6x
2.11   SetTempReg  to : OFF
2.12   PrimeTub    60000µl
2.13   IncubateTS  00:05 250µl 0.5x SSC->Slides 6x
2.14   IncubateTS  00:05 250µl TNT->Slides 6x
2.15   PrimeTub    60000µl
...
3      Module      AB incubation
3.1    IncubateTS  00:15 250µl Block->Slides 2x
3.2    IncubateTS  02:00 250µl AB1(aDIG-POD->Slides
3.3    IncubateTS  00:05 250µl TNT->Slides 6x
3.4    IncubateTS  00:05 250µl PBST->Slides 2x
3.5    IncubateTS  00:05 250µl PBS Imid->Slides 2x
3.6    IncubateTS  00:05 250µl TSA1->Slides
3.7    IncubateTS  00:05 250µl PBST->Slides 6x
3.8    IncubateTS  00:05 250µl TNT->Slides 6x
3.9    IncubateTS  00:15 250µl DAPI->Slides 2x
3.10   IncubateTS  00:05 250µl TNT->Slides 2x
3.11   PrimeTub    60000µl
...
4      Module      Finishing method
4.1    PrimeTub    60000µl
4.2    RinsePort   10000µl Reservoir->Port 1
4.3    RinsePort   10000µl Reservoir->Port 2
4.4    PrimeNeedle 12000µl
4.5    SetTempReg  to : OFF
...
...
***** end of method *** *****
```
